# Supplementary material for: Identification and characterization of small organic compounds within the corona formed around engineered nanoparticles
Source: Royal Society of Chemistry journal article supplement (doi:10.1039/c8en00161h), 2018-01-01
Supplement: c8en00161h1.zip [file Revised_Supplementary_table_1.xlsx]

## Sheet: normalized MEAN values
						CM = Culture Medium															SLF = Simulated Lung Fluid
						CM-CB			CM-CuO			CM-TiO			CM-ZnO			CM-ZrO			SLF-CB			SLF-CuO			SLF-TiO			SLF-ZnO			SLF-ZrO
AlignID	RT [min]	NAME	CAS	MatchFactor		MEAN	SD		MEAN	SD		MEAN	SD		MEAN	SD		MEAN	SD		MEAN	SD		MEAN	SD		MEAN	SD		MEAN	SD		MEAN	SD
1	8.224	Pyridine	110861	99.48		1.53304e-05	1.63402e-05		2.28564e-06	3.16176e-06		1.62283e-06	7.03455e-07		4.41865e-06	4.34564e-06		4.20858e-07	6.44291e-07		2.411e-06	2.46673e-06		1.40472e-05	1.99424e-05		2.0884e-06	1.02056e-06		1.64171e-05	2.37938e-05		1.06673e-05	1.65864e-05
2	17.5115	similar to Lumichrome	1086802	84.86		0.00711024	0.00350907		0.000116328	0.000172715		0.000598853	0.000208487		1.57257e-05	9.15393e-06		0.000669157	9.16228e-05		0.000115117	3.89812e-05		5.45478e-05	3.71625e-06		8.66497e-05	4.4104e-05		5.30748e-05	2.13373e-05		2.62578e-05	7.09565e-06
3		NA	#N/A	99.35		7.20799e-06	7.43584e-06		7.22929e-05	1.87445e-05		0.000122257	2.37015e-05		8.43889e-05	2.78826e-06		1.33177e-05	5.20141e-06		3.64689e-06	4.87271e-07		9.46867e-05	2.50244e-05		0.000110811	4.23435e-06		0.000147854	3.68041e-05		6.04366e-06	2.58425e-06
4	8.2303	5-aminoimidazole-4-carboxamide degr	360974	85.16		2.04363e-06	9.69479e-07		3.7934e-06	6.14448e-06		4.94941e-07	6.46222e-08		7.71852e-05	8.73623e-06		5.0039e-07	3.65881e-08		1.73209e-07	4.12055e-08		3.67408e-07	6.86696e-08		2.40545e-07	1.20798e-07		3.43818e-07	7.92155e-08		1.64689e-07	1.13516e-07
5	8.6464	Carbodiimide	1000700	99.67		0.00247912	0.00143615		7.9501e-06	1.25505e-05		2.07497e-06	8.89939e-07		0.0830688	0.0123243		1.47089e-06	2.07321e-07		9.31146e-07	6.81187e-07		8.56914e-07	6.10241e-07		8.75181e-07	3.05901e-07		1.36276e-06	6.97248e-07		8.80721e-07	1.01215e-07
6	8.4213	alpha-MethylBenzylamine	98840	90.71		5.18196e-05	4.85242e-05		7.57461e-07	3.97456e-07		1.31555e-06	2.53926e-07		0.00120016	0.000553913		5.05171e-07	2.39173e-07		8.77233e-07	4.87542e-07		1.57296e-06	2.43919e-06		4.91907e-07	4.8071e-07		6.14139e-06	5.75523e-06		4.92263e-07	3.83056e-07
7	8.5537	2'-deoxycytidine 5'-triphosphate degr product	102783517	98.33		1.7806e-06	1.32602e-06		0.00161109	0.000323191		5.45118e-05	2.38064e-05		4.08899e-05	1.04777e-05		3.14987e-05	1.00944e-05		1.59368e-05	6.92603e-06		0.000791668	0.000240673		9.84432e-06	6.76253e-06		8.09768e-06	7.74027e-06		4.70054e-06	5.33477e-06
8	8.6205	piperine	94622	82.31		1.33775e-05	2.05614e-06		6.63889e-06	9.12705e-06		5.70858e-06	2.16027e-06		6.24267e-05	1.37068e-05		2.64652e-05	1.11284e-05		3.39894e-05	2.87542e-05		4.96032e-06	7.07151e-06		5.40079e-05	2.28314e-05		6.56163e-05	0.000101618		0.000181003	4.63192e-05
9	10.9493	Phenol	108952	98.15		0.066501	0.00803053		0.139133	0.0207104		0.123743	0.00772199		0.0218315	0.00800579		0.0253582	0.0147359		0.109513	0.0290227		0.108051	0.0146414		0.0991144	0.0133767		0.144042	0.00894827		0.0932263	0.0186489
10	8.6776	Boric-acid	10043353	97.95		0.00159333	0.000278237		0.000104774	0.000172604		0.000326848	0.000142494		0.004527	0.000118019		0.000401506	0.000180398		0.000458811	0.000395056		0.00017272	0.000111815		0.000267615	0.000209335		5.61625e-05	9.2575e-05		0.000228753	0.00016363
11	26.3906	DL-dihydrosphingosine	13552095	93.73		0.0190007	0.00999016		0.00488595	0.00268813		0.0109836	0.00733338		0.00330721	0.000296053		0.0410436	0.00829083		0.0249036	0.00145376		0.0051693	0.00253327		0.0111089	0.00896642		0.00402448	0.00593948		0.00719674	0.00153207
12	20.4703	NA	#N/A	98.07		0.000757817	0.000204419		0.00113009	0.000394896		0.00102793	4.14746e-05		0.0239576	0.000571338		0.0010306	5.91254e-05		0.000520446	3.92159e-05		0.00083064	0.000203763		0.000514033	7.5634e-05		0.00655506	0.00837993		0.000794276	2.59302e-05
13	8.8869	4-Methylamino-benzoic acid	10541830	78.74		6.78497e-06	2.68927e-06		2.28758e-05	3.68982e-05		4.98305e-05	1.48254e-05		0.000236082	3.69421e-05		2.11136e-05	1.24239e-05		1.95778e-05	6.61919e-06		6.65364e-05	4.58898e-05		1.79908e-05	1.55298e-05		8.28639e-06	1.27386e-05		3.36924e-05	1.51073e-05
14	9.0345	Propane-1,2-diol	17887273	99.09		2.90234e-06	1.95715e-06		9.83376e-06	1.52054e-06		4.79496e-05	6.66851e-06		8.01858e-05	1.35432e-05		1.42066e-05	5.08672e-06		1.37015e-06	2.17193e-07		1.33547e-05	1.53047e-06		4.56316e-05	2.98477e-06		5.88581e-05	2.10874e-05		3.21593e-06	1.06824e-06
15		NA	#N/A	99.35		0.000187633	6.57415e-05		0.000155868	0.000240857		0.00014483	4.4441e-05		0.00358726	0.00035537		5.59273e-05	1.32101e-05		3.29461e-05	6.95047e-06		0.000260229	0.000106905		0.000115793	8.55961e-05		4.0219e-05	4.00231e-05		0.000179171	9.21199e-05
16	9.177	Hexadecane, n-	544763	90.95		8.01177e-05	7.47827e-06		0.00022166	0.000171037		3.97793e-05	5.25529e-06		0.00150181	0.000159125		5.12703e-05	1.57378e-06		0.000145187	4.01659e-05		0.000221597	0.000172208		0.000179105	2.83584e-05		0.00015931	4.42016e-05		0.000125823	1.38054e-05
17	9.2893	NA	#N/A	92.21		0.000886331	0.000357949		5.76433e-07	7.84438e-07		2.03085e-05	3.69052e-06		1.40087e-06	1.31577e-06		3.73092e-05	7.80774e-06		1.94804e-05	7.41406e-06		9.3218e-07	1.14532e-06		6.82987e-06	6.91084e-06		1.83817e-07	1.09122e-07		5.39491e-08	3.06211e-08
18	9.2915	acetanilide 2	103844	90.34		2.86337e-05	2.62221e-05		3.84779e-05	9.98668e-06		0.000127352	3.05264e-05		0.00200573	0.000264441		0.000255145	4.21477e-05		0.000111695	3.64567e-05		3.67751e-05	7.7538e-06		6.59715e-05	1.10265e-05		2.74513e-05	3.46321e-06		3.4728e-06	1.9695e-06
19	15.9026	Dodecane, 4,6-dimethyl-	61141728	94.14		0.000119769	2.32843e-05		9.18134e-05	2.72833e-05		4.67005e-05	1.1741e-05		0.00013099	3.54738e-05		4.87594e-05	7.85256e-07		0.000113036	3.92403e-06		0.000105962	2.85159e-05		0.000113901	2.96618e-05		0.000139901	1.73764e-05		8.4623e-05	4.59546e-06
20	12.4361	D-erythro-sphingosine	123784	98.03		0.00149241	0.000607822		0.00015923	0.000268564		0.000407131	0.000119236		0.000172489	2.98993e-05		0.000347475	0.000111079		0.000278214	7.37344e-05		0.000204627	0.000168984		0.000477384	0.000438329		0.000126097	0.000213452		0.000325729	0.000238219
21		NA	#N/A	99.35		0.00428779	0.00175838		0.00282146	0.00126203		0.00114351	0.000140027		0.00173164	0.000214887		0.00245361	0.000772201		0.000450331	5.36162e-05		0.00339825	0.000927027		0.00055007	0.000108412		0.000906099	0.000348357		0.000640302	9.02723e-05
22	9.7266	NA	#N/A	98.98		0.000654214	0.000452827		0.00162098	5.35019e-05		0.000464661	0.000260486		2.79102e-05	5.14053e-06		0.00136062	0.000240555		0.00255124	4.93302e-05		0.00150534	4.86497e-05		0.00227637	0.00040409		0.00345376	0.000274221		0.0021588	0.000313908
23	10.2127	Glycinamide	598414	88.28		0.000301144	0.000272622		3.18578e-05	4.93444e-05		4.85706e-05	2.31986e-05		2.61555e-05	2.668e-06		0.000101408	2.23732e-05		2.19824e-05	1.15986e-05		3.15735e-05	4.2529e-05		1.96569e-05	1.70219e-05		4.72217e-06	6.2608e-06		9.19856e-06	3.40066e-06
24	10.6975	2-Hydroxypyridine	142085	99.37		0.00125942	0.000233428		0.0547894	0.00754467		0.00662216	0.000267802		9.73021e-05	3.13804e-05		0.001688	0.000795586		0.042967	0.00406912		0.0495642	0.00119378		0.0522151	0.00337137		0.0813559	0.00808505		0.0522841	0.000983089
25	8.8869	4-Methylamino-benzoic acid	10541830	78.74		0.000853233	0.000423027		0.00230636	0.00232827		0.0167312	0.00077146		0.00105856	0.00020611		0.00117083	0.000153388		0.00100597	4.5954e-05		0.00395751	0.00273562		0.0012214	0.000190663		0.000145123	0.000100491		0.00291904	0.000897946
26	11.8571	DL-6,8-Thioctic acid	62464	66.62		3.73197e-06	3.4949e-06		0.000822765	2.8544e-05		0.000459528	2.69611e-05		1.00695e-05	1.43165e-05		0.000123642	7.10982e-05		0.00105477	9.43423e-05		0.00097899	6.13727e-05		0.000835094	0.00068663		0.00107753	0.000823607		0.000918305	0.000134353
27	11.8671	DL-6,8-Thioctic acid	62464	66.62		0.00495989	0.00116676		0.0172593	0.00600021		0.0238683	0.00435117		0.00903554	0.00161681		0.0133746	0.00104658		0.0100831	0.00143695		0.0286872	0.00807146		0.0199176	0.00286381		0.0040564	0.00107212		0.00791807	0.0013667
28	10.6273	guaiacol	90051	87.42		0.0219763	0.00491401		0.0505011	0.00176968		0.0358319	0.00256688		6.16088e-06	1.78121e-06		0.0072072	0.00423294		0.0429293	0.00423766		0.0421142	0.00787372		0.0512468	0.00778362		0.0944122	0.00388432		0.0462115	0.00920729
29	11.2866	Purine	120730	95.46		0.0307616	0.00434415		0.0308435	0.0064687		0.0580551	0.00797286		0.00174859	0.000744887		0.0327952	0.00172594		0.0383673	0.0110957		0.0389529	0.0161095		0.0470683	0.0225654		0.0811343	0.0148073		0.0295993	0.00894489
30	11.1777	NA	#N/A	76.81		0.00270621	0.000572173		0.000782025	0.000571283		0.00316701	0.000558704		0.0182048	0.00189549		0.00221389	7.36024e-05		0.00102699	9.58023e-05		0.0014139	0.00053447		0.000886904	0.000788667		0.000423182	0.000191412		0.000216516	5.93961e-05
31	11.1744	NA	#N/A	70.65		3.92581e-05	8.94623e-06		0.000743806	0.000568119		0.00342718	0.00036715		2.16139e-05	5.14444e-06		0.00229466	0.000100558		0.000942005	9.43668e-05		0.00129147	0.000508267		0.000824176	0.0007548		0.000392108	0.000151382		0.00017103	6.57918e-05
32	11.1755	Lactic acid	79334	93.52		0.00289341	0.00111736		0.000455109	0.000339233		0.00199411	0.000234953		4.24277e-05	9.9842e-06		0.00136881	5.02676e-05		0.000589612	6.4254e-05		0.000882834	0.000368806		0.00056792	0.000524663		0.000332214	0.000194345		0.000150872	4.69068e-05
33	15.5201	Cadaverine	462942	99.08		0.00205453	0.000788816		8.90008e-05	5.39731e-05		0.000230533	5.85381e-05		0.000889603	6.62892e-05		0.000348714	3.05185e-05		0.000167085	8.43964e-05		0.000134236	1.23043e-05		4.3909e-05	5.14834e-05		4.3388e-05	3.61227e-05		6.47367e-06	3.23916e-06
34	42.3409	2-Hydroxydodecanoic_acid	2984556	70.09		0.000196227	2.88113e-05		2.5812e-05	6.10481e-06		8.57461e-05	1.69105e-05		0.00104602	0.000403227		6.96001e-05	1.09154e-05		3.1409e-05	4.0486e-06		1.87876e-05	8.04897e-06		2.03576e-05	1.15353e-05		2.88252e-05	3.08436e-05		2.13984e-05	3.94523e-06
35	11.5603	Coumarine	91645	80.18		0.000658353	0.000259448		0.000745855	0.000606494		0.000781852	8.27483e-05		4.38474e-05	8.21913e-06		0.00045089	9.56239e-06		0.000147155	8.13884e-05		0.000776806	0.000210848		0.000244208	0.000163902		0.000340639	0.000118946		0.000138169	7.01249e-05
36	22.2462	phenylalanine	63912	93.71		0.00552876	0.000772164		0.00123598	0.000371704		0.000255527	0.000186974		4.373e-05	6.88347e-06		0.0002132	0.000178546		0.00049949	0.000191486		0.00103639	0.000292955		0.000640122	0.000195522		0.00167309	0.000164725		0.000468416	0.000259061
37	11.5202	benzyl thiocyanate	3012371	95.13		0.000144593	3.74317e-05		0.000559773	0.000231964		0.000454057	3.84717e-05		7.54999e-06	1.74332e-06		0.000228866	7.89929e-05		0.000121128	4.29151e-05		0.000169393	8.8583e-05		0.000268981	0.00018123		0.000370654	0.000351792		0.000199435	0.00014022
38	11.577	NA	#N/A	98.38		0.000869712	0.000322336		0.000432798	6.92625e-05		0.000735111	1.27155e-05		3.34372e-05	7.59561e-06		0.000370051	6.71328e-05		0.000394446	7.23391e-05		0.000407584	7.70315e-05		0.000866543	4.85271e-05		0.00464762	0.000717512		0.000613365	0.000141786
39	12.0681	Valine	72184	99.82		0.00669407	0.00173371		0.000140673	2.93381e-05		0.00706424	0.000177838		0.012825	0.00370539		0.000620664	0.000156649		0.00169065	0.000329703		0.000140969	5.51562e-05		8.84222e-05	5.72891e-05		0.000870734	0.00138332		5.95125e-05	3.2228e-05
40	12.2363	Undecane, 4,7-dimethyl-	17301325	98.51		0.000137248	1.74007e-05		0.000103609	4.17437e-05		0.000190291	3.35275e-05		0.000892508	9.16491e-05		0.000253847	3.92231e-05		0.000111284	3.24504e-05		0.000166455	2.20843e-05		0.000141485	3.11097e-05		0.000155157	3.81944e-05		0.000109808	3.99765e-06
41	12.1935	Undecane, 5,7-dimethyl-	17312833	98.28		3.05207e-05	1.70335e-05		7.83723e-05	7.78856e-06		5.86302e-05	5.54512e-05		5.6688e-06	1.63968e-06		0.000102505	3.53933e-06		5.93355e-05	7.89198e-06		8.15159e-05	1.82769e-05		5.71965e-05	6.88315e-06		0.000105499	5.50059e-05		4.72592e-05	1.99953e-06
42		NA	#N/A	99.35		5.78841e-06	5.49403e-06		0.000508078	0.000367099		6.25259e-06	3.15641e-06		0.000247986	5.40774e-05		3.70182e-05	2.82971e-05		2.54104e-06	6.64073e-07		0.00034866	0.000219691		4.39418e-06	1.378e-06		1.92882e-05	2.15248e-05		3.30043e-05	4.33616e-05
43	12.5026	atropine	101315	93.15		0.000859872	0.000146264		0.000689536	0.000203929		0.000564596	0.000144563		0.00419349	0.00072261		0.000787758	9.29531e-05		0.00111871	0.000109543		0.000686137	0.000160569		0.00138228	0.000295123		0.00134955	0.000419471		0.00128642	0.000125151
44	14.5914	Shikimic acid	138590	98.44		0.00145037	0.00123944		0.000213656	0.000225678		0.000458869	0.000108683		0.000935951	0.00019973		0.000407234	0.000124534		0.000279548	7.68495e-05		0.000236168	0.000138025		0.000464624	0.000432327		0.000131853	0.000209377		0.000313085	0.000227428
45	12.5321	Sarcosine	107971	99.47		0.0026173	0.00115002		0.000622661	0.000105884		0.00140435	0.000364946		0.000239543	4.37695e-05		0.00206062	0.0001299		0.00105035	0.000207028		0.000799786	0.000296859		0.000750423	0.000110477		0.00046012	0.000698055		0.000847382	5.65212e-05
46		NA	#N/A	99.35		0.00218847	0.000240589		7.25028e-05	3.37112e-05		0.000118356	6.93366e-06		0.000973467	0.000107211		0.000101973	8.67011e-06		0.000160473	4.13405e-05		0.000129854	2.56077e-05		0.00016898	5.7262e-05		0.000130438	2.77173e-05		8.84403e-05	1.73964e-05
47	25.4674	Pyrazine, 2-hydroxy-3-methyl-	19838074	79.09		0.00581282	0.000920455		0.00105414	7.59887e-05		0.000747656	0.000206359		5.47046e-05	4.50982e-05		0.000530293	5.18317e-05		0.00816426	0.000712598		0.00102927	0.000234941		0.00867812	0.000815046		0.0130995	0.00173267		0.00959279	0.000597204
48	13.0132	Glycine	56406	99.08		6.07864e-05	8.16218e-05		9.56398e-06	1.56019e-05		8.20009e-05	6.91562e-05		0.00166378	0.000199979		5.43736e-06	3.18068e-06		3.45755e-05	4.80343e-06		6.28513e-06	2.10953e-06		1.1264e-06	7.66804e-07		9.06929e-07	4.16399e-07		5.2664e-07	5.61888e-07
49	12.9235	m-cresol	108394	92		6.96738e-05	2.44493e-05		2.42274e-05	5.77552e-06		4.93551e-07	1.83436e-07		0.000626164	8.16023e-05		4.35862e-07	2.75134e-07		2.77533e-05	5.95348e-06		2.32891e-05	5.99511e-06		3.36769e-05	6.33611e-06		5.96593e-05	2.49844e-05		3.11938e-05	2.4144e-06
50	13.4521	NA	#N/A	91.3		0.00494661	0.00291887		0.000199017	0.000237896		0.00291891	0.00034254		0.00243423	0.000489939		0.00282683	0.000727205		0.000972352	0.000100874		0.000144	7.54768e-05		0.000964571	0.000913582		0.000123475	0.000192658		0.000829853	0.000419704
51	34.6909	NA	#N/A	80.67		0.000344835	0.000108478		0.00129674	0.000297221		0.000121492	7.30657e-05		0.000189338	0.000143294		0.000110445	2.65762e-05		5.36701e-05	4.43257e-06		0.000810305	0.000208009		4.79847e-05	3.12391e-05		0.000661724	0.000142181		0.000113637	2.80957e-05
52		NA	#N/A	99.35		7.09101e-05	3.08985e-05		6.86808e-05	1.27447e-05		0.000231808	3.92543e-05		8.41789e-05	0.000138673		6.99676e-05	1.51075e-05		4.42891e-05	1.03797e-05		6.37677e-05	4.88195e-06		0.000138653	1.55961e-05		0.000100714	0.000110635		6.58962e-05	1.42843e-05
53	35.4774	Indole-3-acetaldehyde	2591982	84.97		0.000215472	0.000102641		4.07278e-05	2.0141e-05		0.000121665	7.09304e-06		5.54906e-06	2.5207e-06		0.000132895	6.42086e-06		8.60806e-05	1.56885e-05		6.78421e-05	1.35394e-05		8.45107e-05	2.18055e-05		0.000146492	0.000126259		8.23325e-05	6.93956e-06
54	13.7573	Triacontanoic acid	506503	76.28		0.000352658	0.000116892		4.43252e-05	1.50828e-05		9.65172e-05	4.5149e-05		0.00072725	0.000123966		1.06686e-05	2.17372e-06		0.000178397	1.57448e-05		5.3497e-05	2.27203e-05		7.93868e-05	0.00010549		3.12406e-05	1.33355e-05		1.49997e-05	1.31241e-05
55	20.2491	L-Norleucine	327571	99.74		0.0125176	0.0025033		0.000149025	9.09424e-05		0.00425007	0.00104359		0.0440247	0.0733463		0.000587211	0.000260981		0.00176961	0.000482956		0.000403221	4.12414e-05		3.12261e-05	3.23385e-05		0.000619157	0.000850845		9.17996e-06	4.29639e-06
56	14.3395	1,2-cyclohexandione 2x	765877	93.02		0.00137403	0.000604744		0.00937619	0.00350242		0.000846683	0.000649268		2.94693e-06	1.25672e-06		4.94581e-06	4.2338e-06		0.00234284	0.000456285		0.00998144	0.00237622		0.0043248	0.00112279		0.00329879	0.0015888		0.00134796	0.000491462
57	14.4613	Isoleucine	73325	98.97		0.00253922	0.000781927		0.000152663	0.000125533		0.00282804	0.000529839		0.000425305	0.000117045		0.00049392	9.48483e-05		0.000468902	9.04323e-05		0.000406992	0.000522513		5.45478e-05	6.3074e-05		7.1093e-05	8.97629e-05		9.62114e-06	9.64573e-06
58	14.4586	nonylaldehyde	124130	86.69		0.000220101	2.61149e-05		1.26645e-05	1.73067e-05		0.000164217	0.00022014		1.52678e-05	1.70658e-06		6.9228e-05	1.44426e-05		0.000227954	2.41255e-05		0.000130508	0.000198924		4.57862e-06	3.06256e-06		6.09032e-05	9.81503e-05		5.54336e-06	1.49091e-06
59	14.5465	2-Fluoroimidazole	57212347	68.89		0.000758416	0.000448377		0.000112868	0.000186265		0.000336351	0.00011992		4.20542e-05	6.46868e-06		0.00019243	3.51328e-05		0.000103198	5.04093e-05		0.000429502	0.000588461		4.97062e-05	6.66209e-05		4.7103e-05	6.03152e-05		3.72336e-06	1.3728e-06
60	15.7384	NA	#N/A	98.31		0.0073699	0.00695704		0.00144105	0.00160488		0.0255951	0.000617235		0.00499926	0.00247733		0.0306556	0.000535172		0.00714465	0.00607985		0.000525924	0.000179631		0.0101656	0.00131574		0.0167159	0.025636		0.0175497	0.00806643
61	14.5402	3-Chloro-1,2-propanediol,	96242	97.27		0.000108919	4.21956e-05		2.07087e-05	4.06964e-06		7.85851e-05	1.61143e-05		0.0092746	0.0025065		4.31465e-05	1.6546e-05		6.49043e-05	1.34307e-05		3.81023e-05	6.9276e-06		5.59966e-05	1.34139e-06		9.67037e-05	5.08681e-06		2.26675e-05	1.69732e-06
62	15.3928	NA	#N/A	88.67		2.11108e-05	5.86313e-06		0.00227382	0.000474927		2.36479e-05	1.58717e-05		2.56758e-06	2.5229e-06		3.11393e-05	3.50104e-07		6.12505e-05	5.89864e-06		0.00296605	0.000392209		5.52111e-05	4.07763e-06		5.45148e-05	6.64826e-06		6.56968e-05	6.14872e-06
63	14.9972	Tridecane	629505	97.05		1.97663e-05	4.69467e-06		2.21729e-05	4.37423e-06		1.60809e-05	5.95062e-06		5.41427e-05	2.47851e-05		1.07339e-05	5.27607e-06		3.46985e-05	4.59411e-06		2.3714e-05	1.45013e-06		3.67419e-05	7.82643e-06		3.79621e-05	6.31571e-06		2.93436e-05	1.9341e-06
64	15.1083	Hexane, 3,3-dimethyl-	563166	92.97		2.16516e-05	4.10641e-06		2.17783e-05	4.99989e-06		7.34949e-05	1.73941e-05		1.66953e-05	2.27033e-06		1.19003e-05	3.54973e-06		2.89012e-05	3.73758e-06		2.21262e-05	7.64136e-07		2.9886e-05	2.78465e-06		3.27192e-05	3.47341e-06		2.12377e-05	1.09338e-06
65	14.7493	Decane, 1-iodo-	2050773	96.8		4.17637e-05	1.47721e-05		3.25094e-05	2.30854e-05		4.42888e-05	3.00591e-05		3.92365e-05	1.16482e-05		2.00084e-05	4.19482e-06		2.82364e-05	1.96929e-06		7.31381e-05	7.05005e-05		3.00916e-05	8.39089e-06		2.97564e-05	3.64813e-06		2.17664e-05	2.37095e-06
66	19.176	NA	#N/A	90.66		0.00205194	0.000785086		0.000439097	5.32551e-05		0.00105201	2.20685e-05		1.6396e-06	2.90317e-07		0.00106421	3.58372e-05		0.00057693	5.57255e-05		0.000371777	6.4841e-05		0.000664749	0.00010216		0.000366764	0.000415565		0.000607215	1.41431e-05
67	15.2195	fucose 2	2438804	89.66		2.26387e-05	1.07722e-05		1.5618e-05	2.99959e-06		2.57213e-05	5.29371e-06		0.000184476	1.2602e-05		3.5516e-05	2.29325e-05		3.00267e-06	8.6465e-07		2.6001e-05	4.22325e-06		2.41026e-07	6.04687e-08		1.9305e-06	1.78912e-06		6.07111e-07	2.32747e-07
68	15.2032	4-hydroxymethyl-3-methoxyphenoxyacetic acid	83590776	60.23		1.20215e-05	1.43359e-05		0.000350225	0.000307191		4.02348e-06	6.52091e-06		1.71527e-06	2.94152e-06		1.98305e-07	8.06807e-08		1.48784e-06	2.76891e-07		6.03202e-05	8.94752e-05		1.04575e-05	1.49644e-05		0.000210672	0.000252548		2.88897e-06	1.40126e-06
69	15.8358	malonamide	108134	89.2		0.000125754	3.64452e-05		8.0749e-05	1.95363e-05		0.000143569	1.64407e-05		9.38614e-06	4.73996e-06		6.20782e-05	6.69771e-06		5.48472e-05	1.32124e-05		9.08333e-05	1.7386e-05		0.000200828	2.65672e-05		0.000206794	0.000117833		0.0001306	9.49792e-06
70	15.7504	2-ketoadipic acid	689316	95.53		8.12945e-05	3.70045e-05		2.50199e-05	7.3747e-06		0.000291775	5.59105e-05		5.74557e-07	1.56077e-07		1.71301e-05	2.50743e-06		1.25299e-05	1.84695e-06		1.45514e-05	3.92199e-06		4.04252e-05	3.8237e-06		4.57704e-05	7.12586e-05		4.22522e-06	1.41474e-06
71	15.8467	Diethylenglycol	111466	97.22		0.000135696	1.09557e-05		0.000512553	0.000115909		0.000546891	4.74591e-05		6.27146e-05	1.22649e-05		0.000137037	3.58743e-05		7.13717e-05	1.23532e-05		0.000515834	0.000284088		0.0002412	4.68571e-05		0.00106322	0.00112215		8.22455e-05	2.24733e-05
72	15.9561	NA	#N/A	86.53		0.000144163	1.6649e-05		0.000215594	0.000154154		2.1973e-05	1.22921e-05		1.02914e-05	8.64222e-06		1.97421e-05	1.04029e-05		2.94736e-05	1.54014e-05		0.000200649	0.000142514		2.94165e-05	1.49783e-05		1.42987e-05	1.73955e-05		3.42484e-05	1.80485e-05
73	16.0013	1-phenylethanol	98851	90.16		0.000410699	0.00020074		0.00317118	0.001887		0.000459524	7.14817e-05		0.000287896	6.5694e-05		0.000173177	3.23268e-05		0.000401362	1.23071e-05		0.00238799	0.00148627		0.00046135	0.000137347		0.000668829	0.000150461		0.000554602	0.000195497
74	16.0284	Decane, 3-ethyl-3-methyl-	17312662	98.24		7.38604e-05	1.64189e-05		8.45911e-05	2.12601e-05		2.99445e-05	2.43392e-06		0.000219923	6.39954e-05		2.64877e-05	3.42331e-06		8.7401e-05	9.02366e-06		8.29765e-05	3.52037e-06		9.80596e-05	1.25892e-05		0.000108734	1.4507e-05		7.91544e-05	2.51472e-06
75	16.0953	Serine	56451	98.71		0.0027297	0.000681658		5.91025e-05	2.07015e-05		0.000132535	6.40371e-05		0.000260822	1.93736e-05		9.51141e-05	1.54279e-05		0.000377021	3.84776e-05		6.16962e-05	5.5651e-05		1.02308e-05	6.1122e-06		8.21688e-05	6.45133e-05		8.48965e-06	2.67608e-06
76	16.7239	Pentadecane, n-	629629	98.89		0.000617524	0.000238001		0.000495787	0.000166563		0.000238214	1.93904e-05		0.000374183	0.000105976		0.000277999	4.25764e-05		0.000616483	0.000103577		0.000561245	2.24584e-05		0.000636647	9.47432e-05		0.00120628	0.000321452		0.000557146	7.65244e-05
77	16.4931	pyrophosphoric acid	2466093	91.2		0.032055	0.00559913		0.0306835	0.0106652		0.0238458	0.00478186		1.09937e-06	1.33881e-06		0.0462195	0.00914575		0.0205819	0.000467464		0.0229933	0.000332283		0.00207567	0.0023065		0.0206259	0.0356994		0.0022283	0.00175751
78		NA	#N/A	99.35		0.000721227	0.000313021		0.000289079	4.89281e-05		0.000607496	4.62196e-05		0.017687	0.00124562		0.000723407	1.79334e-05		0.000240365	2.25168e-05		0.000325958	6.02576e-05		0.00297633	0.000191544		0.000541558	0.000194		0.000309491	2.35555e-05
79	16.5095	Glycerol	56815	95.82		0.00127195	0.00118645		0.00112289	0.00038984		0.000464975	8.1004e-05		5.45787e-06	1.22099e-06		0.000575284	0.000306883		0.000476542	8.8498e-05		0.00164346	0.000347987		0.000458023	8.63477e-05		0.00172013	0.00144883		0.000899532	2.73519e-05
80	16.5411	Hemisulfur mustard,	542814	98.65		0.00232576	0.000455939		0.00190558	0.000588179		0.000789081	3.75588e-05		8.31457e-06	5.88061e-06		0.00356455	0.000217463		0.000884721	0.00050418		0.00173431	0.000301606		0.000842323	0.000154356		0.00247522	0.00294356		0.000725135	7.48295e-05
81	17.1316	Succinic-acid	110156	97.58		0.0262821	0.00745741		0.0147855	0.00161102		0.0214015	0.00156823		1.37869e-05	8.93882e-06		0.0393388	0.000386382		0.0128438	0.000707265		0.0113909	0.0025788		0.00537878	0.00204167		0.000121018	9.37974e-05		0.00954142	0.00235618
82		NA	#N/A	99.35		0.00861583	0.00150611		0.00114473	0.000223559		0.00348162	0.000299318		0.00334497	0.00148606		0.00152741	0.000257776		0.00229133	0.000372032		0.000955861	0.000221641		0.000718524	0.000330335		0.00133493	0.000698884		0.000872041	0.00018391
83	47.7696	thymol	89838	96.36		0.00204605	0.000429531		0.00402747	0.000781204		0.00461229	0.000493865		0.000480763	0.000201374		0.0042771	0.00013617		0.00569589	0.00103893		0.00298772	0.000340347		0.00421568	0.00088263		0.00775778	0.00126208		0.00575622	0.000127766
84	17.4467	Fructose-1,6-diphosphate	488697	73.19		0.00129765	0.00010194		5.54772e-05	6.72988e-05		0.000376778	3.52784e-05		5.26055e-07	6.12616e-07		0.000808458	0.000397453		0.000321348	3.02272e-05		7.43741e-05	5.97823e-05		5.86365e-05	3.64414e-05		6.12801e-05	7.35337e-05		2.3201e-05	1.05373e-05
85	17.6091	Hydrogen sulfide	7783064	81.98		0.00409727	0.00146513		0.0237203	0.00191871		5.06949e-05	9.36532e-06		5.01614e-05	2.02229e-05		2.30638e-05	7.7189e-06		0.0153684	0.00823645		0.0218225	0.000338024		0.0282125	0.000800799		0.0264559	0.0017729		0.021968	0.00325473
86	17.5757	NA	#N/A	86.24		0.000196493	0.000154919		1.91956e-05	1.18676e-05		1.07034e-05	1.48248e-05		5.71381e-05	1.58363e-05		1.53047e-05	8.65386e-06		2.29535e-05	4.22507e-06		5.35814e-05	6.61636e-05		1.43665e-05	7.09649e-06		3.75391e-05	2.1317e-05		6.20844e-05	5.55339e-05
87	17.8484	indole-3-acetamide derivative 3	879378	92.36		0.000168506	2.65515e-05		0.000492611	0.000471585		0.00014683	5.92833e-05		5.26833e-05	1.9191e-05		0.000171061	0.000100808		0.000110049	3.91315e-05		0.000705064	0.00117737		5.10819e-05	7.99811e-05		1.74688e-05	1.46452e-05		6.36958e-06	3.00349e-06
88	17.936	1,5-anydroglucitol	154585	94.71		0.000481986	0.000301666		0.000580324	0.000227322		0.00042913	4.47548e-05		9.85105e-05	3.80544e-05		0.000181257	3.43713e-05		0.000189831	2.41593e-05		0.000594473	0.000134867		0.000192744	3.59859e-05		0.00112591	0.00118852		0.00015688	1.31694e-05
89	22.1269	NA	#N/A	97.49		0.000860295	0.000229819		0.000288882	0.000168763		0.000495011	7.09597e-05		0.0070696	0.0119701		0.000232421	4.7255e-05		0.000972861	0.000236526		0.000457363	0.000106046		0.000103146	2.15402e-05		0.000219487	0.000188474		0.00010066	8.7805e-06
90	18.027	Triacontanoic acid methyl ester FAME MIX	629834	76.2		6.27143e-05	1.67631e-05		0.000457946	0.000380286		4.43207e-05	1.20046e-05		2.4883e-06	2.60237e-06		1.25259e-05	1.415e-06		3.60838e-05	1.98588e-05		0.000498118	0.000353751		3.24053e-05	7.9064e-06		0.000236468	0.000280835		3.21725e-05	1.42374e-05
91	18.143	Nicotinic acid	59676	52.79		0.000196098	4.85597e-05		0.00220709	0.00124474		1.32636e-05	4.99938e-06		3.13197e-06	3.21158e-06		3.40123e-06	1.9339e-06		0.000146144	3.57717e-05		0.00131676	0.000413401		0.000601396	0.000407666		0.00134352	0.00124802		0.000397229	4.21599e-05
92	18.0688	Tryptamine, 5-hydroxy-	50679	97.75		0.00050262	0.000271554		4.70818e-05	3.43276e-05		0.000443235	6.41085e-05		0.000534775	0.000124968		0.000173761	1.06038e-05		5.96359e-05	4.59906e-06		0.00022872	0.000135687		9.69449e-05	2.43779e-05		7.20966e-05	4.20215e-05		7.65643e-05	3.4853e-05
93	18.3593	DL-Ethionine	67210	68.23		0.000140937	4.25442e-05		0.00768775	0.00201432		1.9615e-05	1.26984e-05		3.82664e-06	8.01458e-07		1.60313e-06	1.78918e-06		0.000266076	5.69483e-05		0.00895576	0.00103253		0.00109793	0.000171219		0.00103105	0.000173607		0.000481224	9.93338e-05
94		NA	#N/A	99.35		0.000660752	0.000181029		0.00141881	0.000580959		0.00032368	1.12227e-05		3.82716e-05	5.95186e-06		0.000166983	1.65152e-05		0.00056462	8.11101e-05		0.00262813	0.000491989		0.000756119	9.7709e-05		0.000482593	0.00011809		0.000785353	7.56568e-05
95	18.6031	Threonine	72195	86.51		0.001848	0.000825336		9.63629e-05	0.000104683		0.000240564	9.71448e-05		0.00537317	0.00142661		9.73872e-05	1.43322e-05		3.74155e-05	9.41591e-06		6.82703e-05	5.08461e-05		0.000228313	3.67738e-05		8.01719e-05	0.000110596		0.00021969	3.90212e-05
96	18.665	Hydroquinone	123319	95.88		0.00271103	0.001038		0.00414057	0.00276798		0.00564877	0.000512696		1.63375e-06	1.46819e-06		0.00813072	0.00026874		0.0037887	0.000452431		0.00283349	0.00259331		0.00626609	0.000671937		0.00387548	0.00129728		0.00654696	0.000943805
97	26.7163	4-vinylphenol	2628173	89.97		0.0016189	0.000426168		0.000442558	2.08803e-05		0.00222999	6.82738e-05		0.000133266	4.81096e-05		0.00334317	0.000368516		0.001487	3.27412e-05		0.000438472	4.92453e-05		0.000899338	0.000331469		0.000449725	0.000379656		0.00103352	8.60131e-05
98	18.8939	alanine	56417	90.02		0.00155953	0.000325978		0.000679755	0.00021178		0.00520039	0.000391342		3.0527e-05	8.41758e-06		0.00989385	0.000318061		0.00434838	0.000318594		0.000797669	0.000267576		0.00292268	0.00206216		0.00241132	0.00405535		0.00155223	0.00124567
99	18.8177	Benzoic acid,	65850	89.91		3.31513e-05	1.3392e-05		0.000163016	3.48353e-05		0.000382147	1.40601e-05		0.000100143	8.50754e-05		0.000452249	3.50978e-05		0.000209968	4.35058e-05		0.000158846	3.52139e-05		0.000260928	2.72898e-05		0.000199886	0.000159529		0.000317357	5.61999e-05
100		NA	#N/A	99.35		0.0343201	0.00869445		0.0238171	0.00869679		0.0597802	0.000322161		0.000643538	8.70865e-05		0.0785158	0.00101705		0.0292567	0.000933742		0.00547979	0.00944976		0.0395468	0.0212398		0.0329285	0.0569819		0.107224	0.0137463
101	19.0164	2,3-Bisphospho-glyceric acid	138818	83.43		0.0139594	0.000297485		0.00745663	0.0091053		0.0269925	8.62022e-05		5.06876e-05	1.41752e-05		0.0327373	0.000193533		0.0117734	0.000280561		0.000218653	0.000363758		0.0124154	0.000313197		0.0118975	0.0205883		0.0266792	0.000399383
102	19.5389	Nonadecane	629925	98.78		0.000102356	1.49241e-05		0.000172192	0.00010259		4.32293e-05	9.24467e-06		0.000353211	7.89154e-05		0.000849984	7.7678e-05		0.000212104	4.59025e-05		0.000135271	6.36107e-05		0.000232975	5.58677e-05		0.000221555	3.29305e-05		0.000188724	1.92805e-05
103		NA	#N/A	99.35		0.00324213	0.00135648		0.000608966	0.000227447		0.0013524	0.000554904		0.00319649	0.000523112		0.00274451	0.0011196		0.00250083	0.000683878		0.000879417	9.16021e-05		0.00149173	0.00152187		5.93424e-05	6.31722e-05		0.000670464	0.00101398
104	21.5676	22-ketocholesterol	19243302	97		0.000284973	6.9503e-05		0.000428659	0.000219215		0.000192709	8.51521e-05		9.72268e-05	1.70974e-05		0.000631551	0.000225282		0.000139249	2.12548e-05		0.000252477	0.000147152		5.37744e-05	4.42075e-05		7.61603e-05	3.54049e-05		2.27019e-05	1.42097e-05
105		NA	#N/A	99.35		0.00541688	0.00017915		0.000342707	8.63125e-05		0.000584907	0.00012534		2.58586e-05	1.07972e-05		0.000203184	2.62339e-05		0.000217691	5.2119e-05		0.000309879	4.2095e-05		0.000304881	4.42038e-05		0.000281901	0.00040313		0.000338123	3.5197e-05
106	26.6502	Hydrobenzoin,	492706	99.09		0.00247323	0.000473579		0.00490496	0.000695816		0.00560168	0.000334447		0.105167	0.0527504		0.00869742	0.000438506		0.00498956	0.000473629		0.00445383	0.000965216		0.00454565	0.00117072		0.00358735	0.00388528		0.00422575	0.000465224
107	20.1554	Sorbitol, 1,4	652675	96.38		0.0485581	0.00821142		0.0267953	0.000748371		0.0637598	0.00103852		0.0105551	0.00207169		0.0664815	0.000361318		0.0253131	0.00085552		0.0219676	0.000822668		0.0277692	0.000608979		0.0210568	0.0259306		0.0285333	0.00205984
108	26.7163	4-vinylphenol	2628173	89.97		0.00058028	0.000211672		0.000898953	0.000161719		0.0009728	0.000120233		0.00141261	0.000251383		0.00134375	0.000221904		0.00059896	7.03066e-05		0.000796597	0.000359993		0.000814274	0.000346754		0.000347407	0.000388284		0.000651449	0.000135037
109	23.3107	Tricosane, n-	638675	98.79		0.00138424	0.000507782		0.000803213	0.000280777		0.000474475	3.78286e-05		0.00141311	0.000102417		0.000580503	1.57101e-05		0.00140244	0.000195706		0.00104507	6.79812e-05		0.00132529	0.000461271		0.00122563	0.000260049		0.00116292	0.000117484
110		NA	#N/A	99.35		0.0535969	0.0240285		0.000620121	0.000351184		0.00203612	0.00077844		0.000438215	0.000131477		0.0114594	0.0158839		0.00292488	0.00327182		0.000121988	2.85993e-06		0.000545895	0.000483142		0.000700354	0.000875015		0.000723573	0.000503995
111	20.5691	L-Proline	147853	99.42		0.00261561	0.000288389		0.000406846	9.11455e-05		0.00203789	0.000527592		0.0158208	0.0137581		0.00203794	0.000263395		0.000639741	0.000143337		0.0003626	1.78783e-05		0.000453032	0.000299198		0.000188125	0.000189271		0.000461509	0.000368403
112	20.673	Spermine	71443	80.55		0.00459978	0.00140633		0.000898257	0.000519951		0.0077182	0.0013419		0.00304996	0.000182521		0.00436249	0.00068238		0.00222455	0.000309447		0.00110556	0.000110838		0.00214782	0.000969168		0.000250651	0.000217118		0.0005631	0.000143508
113	20.9275	similar to Ditertbutylphenol	128392	96.57		0.0445244	0.0155275		0.0367617	0.000929781		0.00123147	0.000432185		0.000358268	4.70748e-05		0.000655668	0.000229456		0.0358274	0.00106874		0.0328177	0.000338299		0.0369182	0.00777125		0.0639022	0.0166298		0.0287324	0.00240788
114	25.6773	Docosane, n-	629970	97.64		0.000741015	0.000181655		0.000209563	6.90921e-05		0.00115141	0.000144571		0.00288786	0.000209218		0.000635942	0.000239195		0.000350935	6.9004e-05		0.000285926	1.29663e-05		0.00030947	5.73332e-05		0.000291885	7.82099e-05		0.000621109	0.000728083
115		NA	#N/A	99.35		0.000135312	1.92143e-05		1.01429e-05	6.45906e-06		0.000512353	4.78133e-05		0.000112413	1.28181e-05		0.00114444	0.000186489		0.000300328	9.64724e-05		1.3303e-05	6.02262e-06		0.000655151	0.000158953		0.000766512	0.000710605		0.000739784	0.000119561
116	20.9188	Gly-Gly	556503	96.35		0.000244513	0.000310346		0.000243411	4.05809e-05		1.31332e-05	4.15763e-07		0.0392314	0.0360526		8.08571e-05	8.03761e-05		0.000341749	3.02268e-05		0.000237301	1.23634e-05		0.000291071	1.54861e-05		0.000384352	8.44928e-05		0.000235022	3.19666e-05
117	25.1301	Pentadecan-1-ol, n-	629765	91.58		0.000630261	8.11245e-05		0.000385316	0.000250282		0.000214224	0.000138608		0.000178968	3.27047e-05		0.000149832	1.62526e-05		0.00078715	9.38687e-05		0.000536093	0.000193464		0.000628497	0.000459873		0.000531095	0.000392481		0.000723395	0.000139595
118		NA	#N/A	99.35		0.000161049	0.000109771		0.000107605	4.38654e-06		0.000130346	4.11051e-05		0.00879841	0.00107048		2.4075e-05	1.22295e-05		4.56155e-05	7.09793e-06		9.45928e-05	5.7504e-06		0.000120325	5.65727e-06		0.000180293	2.40751e-05		0.000115031	3.88983e-06
119		NA	#N/A	99.35		3.30994e-05	8.28163e-06		2.97252e-05	1.32653e-05		2.06259e-05	3.09926e-07		0.000204052	0.000101966		2.508e-05	1.2069e-06		3.77726e-05	7.24466e-06		3.30777e-05	8.09982e-06		3.54119e-05	8.91916e-06		3.40835e-05	1.46702e-05		2.81993e-05	4.21943e-06
120	21.3372	4-Hydroxyphenethyl alcohol	501940	98.48		0.000539197	3.65635e-05		0.000687489	6.62897e-05		0.00125401	8.88427e-05		4.69989e-05	1.0872e-05		0.00160216	2.89429e-05		0.000852649	8.95331e-05		0.000680111	0.000152196		0.000830702	0.000136582		0.00030907	0.000471314		0.00076669	8.25385e-05
121	21.4579	ParaXanthine	611596	66.73		1.64254e-05	3.09786e-06		6.13093e-05	5.48075e-06		0.000174521	2.29567e-05		0.00102216	0.000284918		7.60972e-05	9.84676e-06		3.12758e-05	4.87918e-06		3.16971e-05	9.67044e-06		5.21698e-05	6.24894e-06		4.50665e-05	5.36169e-05		4.4928e-05	5.98542e-06
122	21.7307	Mandelic acid, 3,4-dihydroxy-	775019	90.19		7.27026e-06	1.65838e-06		3.49065e-05	6.17903e-06		1.21839e-05	2.10995e-06		2.11992e-06	1.73511e-06		4.36903e-05	5.01416e-06		4.4372e-06	8.21077e-07		3.36375e-05	4.15258e-06		1.9057e-05	7.50723e-06		2.48843e-06	5.14273e-07		9.10502e-06	2.22174e-06
123	28.2252	Tetracosane	646311	97.73		0.000568835	8.79745e-05		0.000242603	9.98137e-05		0.00019626	2.12618e-05		0.00587388	0.000236174		0.000203276	5.1909e-05		0.000577626	0.000272306		0.000442232	0.000206292		0.000805694	0.000191476		0.000533634	0.000257934		0.000480623	0.000373963
124	21.9194	Saccharic acid	87730	48.79		0.00053781	0.000318674		2.08689e-07	6.74465e-08		6.39568e-06	1.08757e-06		9.04363e-06	2.58318e-06		1.4691e-06	1.73664e-08		1.31309e-06	4.4721e-07		4.11368e-07	5.60132e-07		1.98485e-07	1.06658e-07		4.82027e-07	4.42474e-07		6.73843e-07	6.73503e-07
125	21.9575	Valeric acid, 3-hydroxy-3-methyl-	150969	86.02		4.07402e-05	7.33588e-06		3.0353e-06	6.60848e-07		1.65992e-05	1.24278e-05		6.31371e-05	1.05715e-05		3.43678e-05	1.49398e-05		4.48515e-05	1.93232e-06		3.5608e-06	7.34123e-07		5.4569e-05	2.7299e-05		3.66787e-05	3.59741e-05		4.02783e-05	6.51259e-06
126	22.1215	Decane, 3,3,5-trimethyl-	62338130	89.89		7.24745e-05	1.18861e-05		3.82619e-05	1.77995e-05		1.56155e-05	8.78253e-07		2.33457e-05	1.31938e-05		2.01545e-05	1.57366e-05		8.0356e-05	1.26116e-05		4.87272e-05	9.08853e-06		8.99411e-05	7.61765e-05		9.08395e-05	4.65375e-05		7.86024e-06	1.00479e-06
127	22.0556	Quinic acid	77952	70.57		0.000272209	4.9824e-05		9.59217e-06	2.14388e-06		1.93703e-05	6.20078e-06		7.7462e-05	2.60834e-05		0.000417811	2.68995e-06		5.11716e-05	1.33306e-05		5.64339e-06	4.91416e-06		2.19499e-05	8.33804e-06		5.355e-06	5.8663e-06		1.58498e-05	3.13297e-06
128	22.1846	DL-threo-beta-Methylaspartic acid	6667603	71.21		0.0025929	0.00109404		3.75438e-05	1.39005e-05		1.32283e-05	5.06445e-06		5.73798e-05	4.79385e-05		0.000525179	0.000575504		0.00024827	3.6253e-05		6.34546e-05	5.69812e-06		3.50888e-05	5.53941e-05		2.8486e-05	4.2538e-05		6.24901e-06	7.00265e-06
129	22.1268	Bicine	150254	59.21		0.000425411	1.50237e-05		0.00028503	8.96833e-05		0.00011652	1.18462e-05		5.53463e-06	4.58985e-06		0.000158838	3.63013e-05		0.000497386	5.49423e-05		0.000309887	3.54543e-05		0.000588881	0.000159365		0.000141603	0.00020088		0.00042981	2.20744e-05
130	22.1374	4-Hydroxybenzoic acid	99967	96.25		0.000177553	1.67083e-05		0.000526029	0.000118371		0.000130292	2.44117e-05		3.29714e-06	1.52998e-06		0.000104694	1.19776e-05		5.71627e-05	1.06119e-05		0.000448065	0.00011671		4.30736e-05	3.25236e-06		3.70558e-05	6.06002e-05		3.2632e-05	2.8976e-06
131		NA	#N/A	99.35		0.00604595	0.000900143		3.20095e-05	1.15511e-05		6.34622e-06	1.61457e-06		8.81392e-05	2.43382e-05		0.000710068	0.000642637		0.000277021	4.66806e-05		5.07095e-05	1.29896e-06		1.95994e-06	3.61274e-07		1.19398e-06	1.31797e-06		1.16828e-06	1.38382e-08
132	28.6472	Hexacosane, n-	630013	98.01		0.000726336	9.34285e-05		0.00067407	0.000214543		0.000498711	0.000346459		0.000373303	0.000138356		0.00177048	0.000214438		0.000909933	6.14892e-05		0.000567115	0.000198733		0.000678645	0.000246804		0.00162686	0.000936314		0.000791118	0.000186863
133	22.7041	Dodecane, 2,7,10-trimethyl-	74645980	92.69		3.09426e-05	1.08232e-05		3.89907e-05	1.64726e-05		7.8486e-06	3.42072e-06		0.000666238	0.000107023		0.000105284	1.19968e-05		7.24309e-05	1.17249e-05		4.78345e-05	6.84772e-06		6.86069e-05	2.98011e-05		4.29792e-05	3.02272e-05		6.92798e-05	1.68907e-05
134		NA	#N/A	99.35		7.52944e-05	2.96169e-05		9.70251e-05	2.19591e-05		4.92107e-05	6.1784e-06		1.21558e-05	4.25028e-06		8.5488e-05	1.12009e-05		9.0462e-05	6.86989e-06		0.000173772	8.01243e-05		4.57647e-05	2.68112e-05		8.38392e-05	1.63261e-05		4.59976e-05	6.01093e-06
135	22.3762	NA	#N/A	97.88		0.000828893	0.000295495		0.0010402	0.000185513		0.000155902	3.50857e-05		5.36104e-05	1.4637e-05		6.23601e-05	2.03084e-05		4.42774e-05	3.90163e-06		0.000878876	0.000118144		0.000937937	0.000144368		0.000457353	0.000752848		0.000894056	0.000128382
136	32.2631	3-4-hydroxyphenyl-propionic acid	501973	98.01		0.0155616	0.00143005		0.0170677	0.00189438		0.00299785	0.000182099		0.183561	0.107674		0.0102067	0.0117433		0.0187628	0.000616147		0.0159704	0.000359089		0.0206477	0.00224857		0.0103897	0.0162142		0.0185871	0.0013476
137		NA	#N/A	99.35		0.00044874	0.000169094		8.65252e-05	8.95078e-05		0.00065967	0.000113047		0.000199534	3.36085e-05		0.00136761	5.95261e-05		0.000595796	6.12557e-05		0.00016232	9.93486e-05		0.000249605	0.000265937		3.92218e-05	3.44977e-06		5.70416e-05	1.59979e-05
138	22.534	Kaempferol [+H2]	520183	38.11		9.36573e-06	1.15119e-06		6.80961e-06	2.85827e-07		9.17079e-06	2.92086e-07		0.000112302	5.80419e-05		2.18427e-05	6.61493e-07		2.048e-05	3.23246e-06		9.88181e-06	3.91309e-06		1.67166e-05	5.22708e-06		2.4678e-05	3.9248e-05		3.75182e-05	7.57606e-06
139	22.4519	NA	#N/A	83.1		1.29794e-05	5.29399e-06		3.73429e-05	2.59112e-05		1.57382e-05	1.04786e-05		0.000448621	9.36393e-05		2.94098e-05	4.31742e-06		5.69727e-05	9.78996e-06		6.11089e-05	4.71832e-05		4.54698e-05	3.42685e-05		2.74941e-05	4.50765e-05		5.22234e-05	5.19266e-06
140	22.6129	NA	#N/A	72.36		0.000140974	7.89289e-06		2.66023e-05	3.85951e-05		5.03452e-05	9.36673e-06		0.000762519	0.000399453		0.000121462	1.44216e-05		0.000116905	6.46341e-06		2.54433e-06	1.56698e-07		3.35646e-05	1.06655e-05		4.69234e-05	7.28092e-05		4.29182e-05	5.08804e-05
141	27.1883	Isoguvacine	64603903	84.57		0.000934938	0.000368151		0.000241787	0.000171944		0.000391102	0.000135463		0.00104129	0.000397467		0.000604713	0.000186556		0.000440856	2.39512e-05		0.000339952	0.00014133		0.000417047	0.000130461		0.000184086	0.000209314		0.000391488	7.40843e-05
142	23.0034	galactinol	3687647	81.47		0.000854401	0.000315656		9.70451e-05	1.35151e-05		0.000144724	5.07349e-06		0.020218	0.0068429		0.00033412	0.000242834		0.000219264	0.000193949		6.87907e-05	1.35706e-05		9.00939e-05	6.33868e-06		0.000123822	5.42858e-05		0.000120223	4.04619e-06
143	23.0577	Calystegine B4	184046853	93.64		0.00175765	0.000321869		9.88799e-05	2.30009e-05		0.000451429	0.000168756		0.000612986	5.8223e-05		0.000561805	0.000263692		0.000638528	0.00016949		6.93609e-05	1.06972e-05		0.000441459	0.000414995		8.58282e-05	6.29258e-05		0.000225516	0.000239594
144	23.3328	NA	#N/A	91.17		0.000733223	0.00031892		0.00025487	2.98865e-05		0.000270622	0.000107762		0.00616198	0.00152889		0.000556482	1.95614e-05		0.000360633	7.23973e-05		0.000201865	4.45904e-05		0.0001955	4.49359e-05		0.000204226	0.000246979		0.000294819	3.99748e-05
145	23.479	NA	#N/A	89.28		0.0152039	0.00367951		0.00666425	0.00327645		0.00963859	0.000597758		0.000263201	6.47264e-05		0.0110221	0.00107561		0.00923727	0.00131692		0.0128577	0.00964312		0.00772707	0.00450324		0.00351802	0.00599382		0.00702832	0.000211135
146	23.4945	Citrulline	372758	74.97		0.0022889	3.24037e-05		0.000866099	0.000548504		0.00174312	8.29379e-05		0.000379482	0.000204168		0.00216167	0.000189661		0.0016333	0.000209128		0.00095732	0.000821607		0.00142641	0.000816817		0.000667451	0.00112867		0.00128771	2.26219e-05
147	24.4017	beta-N-Methyl-amino-L-alanine	15920931	94.26		0.00596417	0.00100051		0.005083	0.00205982		0.0259017	0.0108866		0.0087958	0.000725555		0.012165	0.000608655		0.00669931	0.000718687		0.00790041	0.0015741		0.0189343	0.00230272		0.00210315	0.00167015		0.00535894	0.000681682
148		NA	#N/A	99.35		1.21135e-05	4.07425e-06		0.0434499	0.0326431		0.0256437	0.0229731		0.00197597	0.00309811		0.00444609	0.00121906		0.000607654	0.000235851		0.0848044	0.0206937		0.0202789	0.0294786		0.0171068	0.0293485		0.0380622	0.0091912
149	28.7941	NA	#N/A	93.83		0.000113986	1.95559e-05		4.58142e-05	1.18776e-05		6.3919e-05	2.87969e-06		0.000281625	7.31947e-05		6.7725e-05	6.42569e-06		0.000101372	7.10638e-06		5.67407e-05	2.71392e-05		0.000142975	2.07557e-05		8.44418e-05	0.000104027		0.000123378	3.2695e-05
150	24.2325	Uridine	58968	92.06		0.00413149	0.000698622		0.00167471	0.000383195		0.00105472	2.37197e-05		0.0170131	0.00100053		0.0022631	0.000203754		0.00185101	0.000243722		0.00143133	0.000468992		0.00128663	0.000251402		0.000903431	0.00116903		0.00142355	0.000109447
151		NA	#N/A	99.35		0.00045537	1.05662e-05		0.000180679	3.46685e-05		0.000524844	2.64533e-05		0.0182858	0.00126144		0.000543515	0.000226856		0.00017554	1.5497e-05		0.000146271	4.13138e-05		0.000142404	2.06051e-05		0.000180774	0.000138614		0.000187645	1.21905e-05
152	23.9974	2,6-Diaminopurine	1904989	78.35		5.20813e-05	1.56666e-05		4.48589e-05	2.04537e-05		3.10886e-05	1.49929e-06		0.00456975	0.00601923		2.94328e-05	3.07537e-06		7.84431e-05	3.2543e-06		5.98562e-05	2.55805e-05		2.32576e-05	5.50667e-06		0.000117988	6.95099e-05		7.8036e-05	2.17487e-05
153		NA	#N/A	99.35		0.000131101	1.70325e-05		6.89015e-06	1.3239e-06		3.40382e-05	5.77976e-06		4.76196e-05	1.14787e-05		3.66636e-05	1.0248e-05		0.000148323	4.41753e-05		9.08091e-05	0.000126676		1.04859e-05	7.39299e-06		9.67653e-06	7.88561e-06		2.27743e-05	8.74254e-06
154		NA	#N/A	99.35		0.00192794	0.000422219		0.000834335	0.000111176		0.000392692	1.89921e-05		0.000637334	0.000172521		0.00175462	6.10717e-05		0.0012315	0.000193809		0.000549301	0.000292875		0.000364888	3.00415e-05		0.000602349	0.000844539		0.000885912	2.9534e-05
155		NA	#N/A	99.35		0.00192008	0.000347943		0.000716809	9.11816e-05		0.000390448	1.37999e-05		0.000518221	9.94108e-05		0.00163586	5.62332e-05		0.00116054	0.000180137		0.000459596	0.000308205		0.00036367	3.37258e-05		0.000560192	0.000775351		0.000844516	9.25074e-06
156	24.2064	R-Phenylephrine	61767	79.42		0.000372617	7.68528e-05		0.0012741	0.000745854		0.00506202	0.00150659		0.000271834	1.75033e-05		0.00246407	0.000165802		0.000952092	0.000970785		0.00219781	0.00106972		0.00437127	0.00148764		0.000296009	0.000300502		0.000970219	0.00112643
157		NA	#N/A	99.35		0.000318104	6.338e-05		0.000125299	2.58658e-05		2.18976e-05	8.06613e-06		0.000102642	7.77459e-05		0.000205109	5.97994e-06		0.000149764	1.7761e-05		9.96473e-05	3.0626e-05		1.9741e-05	2.20463e-06		7.90107e-05	0.000122182		0.000138041	3.66358e-06
158	24.8048	Galactose_2_	59234	82.87		0.000318721	6.5104e-05		0.000109825	2.46053e-05		3.28627e-05	4.33274e-06		0.000152071	1.45892e-05		0.000200758	5.16401e-06		0.000146104	1.68249e-05		0.000100224	4.31263e-05		5.97515e-05	7.02593e-05		7.784e-05	0.000120475		0.000133572	2.42942e-06
159		NA	#N/A	99.35		0.00230245	9.51304e-05		0.00131778	0.000453838		0.000139459	0.000155065		0.000152825	5.65964e-05		4.13531e-05	1.42842e-05		0.00468598	0.000482094		0.00147186	0.000236417		0.00560969	0.000911797		0.00641447	0.000735629		0.00541744	0.000189694
160	33.8516	Benzoic acid, 3,4-dihydroxy-	99503	95.34		0.000758264	0.000179779		0.00332478	0.00248702		0.00103698	6.99204e-05		0.000661893	0.000313558		0.000988522	1.904e-05		0.000686143	0.000118663		0.00367806	0.00110425		0.000255935	0.000130223		0.000130093	0.000128843		0.000243972	4.62941e-05
161	29.8034	Ornithine	70268	96.83		0.000492072	5.43307e-05		9.05824e-05	6.05289e-05		2.01104e-05	5.64013e-06		0.00120374	0.000996755		2.10116e-05	5.46095e-06		0.000125302	2.01341e-05		7.5107e-05	5.99515e-05		5.43823e-05	4.39047e-05		3.51291e-05	4.3151e-05		6.60597e-05	4.40657e-05
162	24.8955	Arginine [-NH3]	74793	75.22		0.000210495	2.28201e-05		1.02376e-05	2.39835e-06		9.17757e-07	5.68855e-07		4.4997e-06	1.97613e-06		3.71269e-05	8.64394e-07		2.6349e-05	4.59496e-06		8.16168e-06	4.1305e-06		2.4656e-06	2.08059e-06		1.33927e-05	2.19012e-05		2.34392e-05	5.12262e-07
163	24.9242	4-nitrophenylphosphate	4264839	44.4		0.000668577	0.000115551		4.08798e-06	8.85054e-07		1.85812e-05	6.33203e-06		7.373e-07	1.00954e-07		3.75064e-05	1.44126e-05		2.29762e-05	4.7682e-06		3.76002e-06	2.80102e-06		2.54694e-06	1.42507e-06		4.01071e-06	5.2957e-06		8.13585e-06	2.44644e-06
164	25.0254	18|0_12|0_Mycolic_acid	#N/A	49.03		1.54306e-05	7.31275e-06		8.9782e-05	2.5074e-05		6.47745e-05	3.96012e-06		5.34619e-06	1.65973e-06		6.54766e-05	7.2625e-06		3.72055e-05	1.67398e-06		0.00010159	1.47952e-05		7.79301e-05	1.50263e-05		2.0326e-05	3.30968e-05		5.98483e-05	9.68764e-06
165	31.0109	3-hydroxypropionic acid	503662	66.46		0.00194481	4.05162e-05		0.00106491	0.000114827		0.000980384	0.000184226		0.00112377	0.000195184		0.000891316	0.000115886		0.00104518	7.3757e-05		0.00103499	9.85727e-05		0.00362858	0.00378294		0.0130561	0.00166591		0.0101638	0.00103588
166	26.0553	Triacontane, n-	638686	97.1		0.000875715	0.000151793		0.000552196	0.000178508		0.000174048	4.12836e-05		0.000942493	0.000262491		0.000147319	5.87459e-05		0.00101842	6.47464e-05		0.0006164	3.35653e-05		0.000938841	0.000195118		0.000799156	0.000158276		0.000876766	4.65269e-05
167	42.0508	Tris2,4-di-tert-butylphenyl- phosphate	95906119	89.19		0.000822412	0.000196013		0.00283195	0.00185282		0.000786917	0.000448995		0.000761392	5.09644e-05		0.000564308	0.000174484		0.00098967	2.71662e-05		0.00430665	0.00335368		0.00137192	0.000513888		0.00164269	0.000427236		0.000881477	9.75718e-06
168	18.0688	Tryptophan, 5-hydroxy-	4350098	97.75		0.00610477	0.00059886		8.09016e-05	2.51305e-05		0.00067993	0.000237205		0.0570147	0.0235415		0.000912696	0.000227602		0.000992952	0.000157141		7.57652e-05	2.77436e-05		0.000112052	8.28716e-05		4.25585e-05	3.76945e-05		0.00020866	0.000120147
169	26.121	Pyruvic acid, 4-hydroxyphenyl-	156398	64.11		1.35497e-05	4.14092e-06		0.00017885	5.5297e-06		0.000199928	1.07373e-05		0.00101485	0.000162703		0.000185721	2.2854e-05		3.60038e-05	6.42768e-06		0.000135672	1.81968e-05		0.000200243	4.17739e-05		5.1528e-05	8.80928e-06		5.3983e-05	1.52187e-05
170	26.0577	4-HydroxyMandelic acid	1198841	59.47		1.90323e-05	1.3387e-05		8.97041e-05	4.43077e-06		9.67134e-05	1.10039e-05		0.000449873	8.23277e-05		9.50856e-05	2.24057e-05		2.22134e-05	2.85801e-06		7.89045e-05	7.62558e-06		9.93059e-05	1.81868e-05		2.72703e-05	4.47433e-06		2.8999e-05	6.75999e-06
171	26.2841	Lysine	56871	79.37		0.00431205	0.000539308		1.90676e-06	1.85393e-06		0.000198947	8.39013e-05		0.000149922	9.07924e-05		0.000425546	0.00010418		0.000831853	0.000159753		2.25431e-06	1.54882e-06		6.55909e-05	0.000109248		3.37415e-06	1.50748e-06		2.12771e-06	1.17223e-06
172	28.8755	2,3-dihydroxybiphenyl	1133637	64.38		0.000226962	2.37499e-05		6.70932e-05	1.79533e-05		0.000323059	3.46265e-05		2.31349e-05	7.43702e-06		0.000295245	1.46822e-05		0.000197041	3.26669e-05		5.80041e-05	3.55378e-05		0.000187986	4.62511e-05		8.7102e-05	0.000104605		0.000144457	1.24315e-05
173	26.445	Alanine, 3-cyano-	6232195	58.76		0.000161054	3.61131e-05		2.63032e-05	7.97439e-06		0.000213052	2.59882e-05		2.36013e-05	1.27712e-05		0.000364491	6.21296e-05		9.45234e-05	0.000108287		2.23007e-05	6.06646e-06		0.000132014	6.12758e-05		0.000187114	2.86797e-05		7.55189e-05	2.03035e-05
174		NA	#N/A	99.35		0.00226363	0.00157592		0.000463577	9.95158e-05		0.000199172	2.80427e-05		0.00024928	3.70728e-05		0.000598815	5.70613e-05		0.00167173	0.000237011		0.000409956	0.000303063		0.000158628	0.000112069		0.000596245	0.000497466		0.000839867	2.53747e-05
175	26.6762	Sorbitol	50704	77.08		0.00248846	0.00110476		0.000210462	1.08302e-05		0.000112771	2.5379e-05		0.000243116	2.9769e-05		0.000188273	0.000133915		0.000928787	0.000162356		0.000194696	0.000139907		8.64169e-05	4.92855e-05		0.000511139	0.000367526		0.000458348	1.81186e-05
176	26.7234	Galactose, 2-amino-2-deoxy-, D-	7535004	89.45		0.00112608	0.000285898		0.0002384	6.0615e-05		0.000126347	2.99019e-05		0.000215742	4.70295e-05		0.000386194	2.91131e-05		0.00101249	0.000142395		0.000210411	0.000157694		7.63079e-05	4.6402e-05		0.000234341	0.000275198		0.000395911	1.55788e-05
177	30.3252	lumazine	487218	68.18		0.000283289	2.82352e-05		2.39694e-05	5.58043e-06		6.78819e-05	2.603e-05		8.07287e-05	3.48941e-05		2.65634e-05	4.13002e-06		3.66181e-05	3.22157e-06		2.15002e-05	7.44096e-06		8.04887e-06	3.08923e-06		1.09912e-05	1.33218e-05		2.16235e-05	4.21594e-06
178	30.5568	L-Cysteine	52904	92.32		0.000515162	8.72875e-05		0.000284996	0.000153628		3.63751e-05	1.41455e-05		0.000344461	7.68863e-05		9.04465e-05	1.8733e-05		7.08185e-05	2.10915e-05		0.000407981	6.84653e-05		1.48969e-05	9.42395e-06		2.46707e-05	2.93002e-05		4.80283e-05	7.30652e-06
179		NA	#N/A	99.35		1.34997e-05	2.49285e-06		2.28232e-06	1.42528e-06		9.42035e-05	1.91082e-05		0.000251883	0.000112477		3.45708e-05	2.95844e-05		1.95446e-05	1.5774e-06		3.32383e-06	1.62945e-06		2.04688e-05	5.19905e-06		2.01796e-05	2.83555e-05		1.0113e-05	5.75933e-06
180	28.0516	Glycolic acid	79141	79.32		0.00073744	0.000178603		0.00113443	0.000466894		0.000430332	0.000101807		0.000110499	1.30088e-05		0.00046431	0.000104698		0.000560936	6.27944e-05		0.00102493	0.000756796		0.000718323	0.000108163		0.000164341	0.000216205		0.000789725	6.36089e-05
181	27.0733	Lauric acid	143077	97.1		2.57314e-05	2.48436e-05		7.18692e-05	2.0028e-05		0.00111397	0.0004166		3.66893e-05	3.39762e-06		0.00158227	0.000875012		2.38703e-05	7.54325e-06		6.89294e-05	4.19216e-05		0.000109008	0.000103122		4.30499e-05	1.62177e-05		3.80726e-05	1.14504e-05
182	38.5432	2-Hydroxyhexadecanoic_acid	764670	60.26		0.0146566	0.0026996		0.00850438	0.00589441		0.0191383	0.00249895		0.0222854	0.0193676		0.0217421	0.00153028		0.00976574	0.00122021		0.00794392	0.0022102		0.00961607	0.00235365		0.00462331	0.00713877		0.00867497	0.00166541
183		NA	#N/A	99.35		0.0118911	0.00090187		0.0011765	0.000417367		0.000230167	5.53594e-05		6.31667e-05	6.00567e-05		0.000462443	5.88814e-05		0.0119752	0.000346094		0.00968572	0.0017199		0.0126454	0.00210285		0.00849942	0.0116732		0.0123941	0.000679255
184	27.352	NA	#N/A	63.86		0.000789735	3.53884e-05		0.000760047	0.000127417		0.000134527	1.26839e-05		6.10915e-05	2.61413e-05		0.000106651	2.57525e-05		0.00128563	0.000138298		0.00090916	0.000171434		0.00110969	0.000276121		0.00101277	0.00118242		0.00165316	0.000346296
185	27.4418	Histamine	51456	75.96		0.000409207	3.63285e-05		4.66263e-05	3.72965e-05		3.9818e-05	1.74971e-05		0.000421098	0.000148446		6.87295e-05	1.25968e-05		9.45224e-05	7.43849e-06		3.80964e-05	4.27064e-05		6.82238e-05	2.55802e-05		3.72014e-05	6.04033e-05		7.03774e-05	1.66347e-05
186		NA	#N/A	99.35		0.00630664	0.00131535		0.00731938	0.00345613		7.50991e-05	7.66545e-05		0.000403299	0.000164177		4.43932e-05	1.00553e-05		0.00994607	0.000336214		0.00838155	0.00227051		0.00956729	0.00397686		0.00543576	0.00791025		0.00974176	0.00172836
187	27.545	Hexadecanoic acid methyl ester FAME MIX	57103	98.67		0.0100959	0.00160695		0.00915641	0.00376334		0.000313914	0.000157298		0.000372368	9.50228e-05		0.00125238	0.000177035		0.0107346	0.000168724		0.00940526	0.00129577		0.0119105	0.00138954		0.00789294	0.0114086		0.0117195	0.00022292
188	33.532	1,3,510-estratrien-3,6- beta-17-beta-triol	#N/A	34.14		0.00285945	0.000881314		0.00419906	0.00571789		0.000249086	6.16736e-05		0.000484175	0.000193115		0.000299957	4.13333e-05		0.0137836	0.000734635		0.00715248	0.00344061		0.0102255	0.00704393		0.00225886	0.00327898		0.00857809	0.00152247
189	27.6873	NA	#N/A	94.92		0.000171325	3.07374e-05		8.01873e-05	0.00010538		4.53514e-05	2.18702e-06		0.00111627	0.0014075		1.46497e-05	3.61727e-06		0.000138819	2.36708e-05		2.97343e-05	1.86829e-05		5.73635e-05	3.93582e-05		1.65046e-05	2.78778e-05		0.000109633	1.96725e-05
190	27.8946	NA	#N/A	51.58		0.00048592	0.000221786		0.000250947	2.25918e-05		0.000605048	8.05532e-05		3.14349e-05	1.41121e-05		0.000446098	0.000228846		0.000201959	8.90023e-05		9.92503e-05	9.63511e-05		0.000190046	0.000150237		5.10544e-05	6.62326e-05		0.000151013	0.000136134
191		NA	#N/A	99.35		6.06231e-05	4.74118e-06		7.81248e-05	0.000109358		1.75506e-05	5.11943e-06		0.00296681	0.00149592		1.63291e-05	3.77297e-06		2.19344e-05	2.16823e-06		3.24969e-05	1.97828e-05		1.04499e-05	6.33861e-06		1.77179e-05	2.87882e-05		5.39395e-06	2.01534e-06
192	27.9548	Decylplastodihydroquinone	112055762	43.22		2.74634e-05	6.11623e-06		0.000304239	0.000295514		0.000244272	0.000322164		3.15916e-06	2.11353e-06		9.00875e-05	1.63622e-05		1.66684e-05	3.66565e-06		0.000580186	1.6554e-05		5.21482e-05	3.76964e-05		3.63247e-05	3.63454e-05		6.4598e-05	6.4439e-06
193	28.3967	Xanthurenic acid	59007	93.55		0.00139778	0.000340765		1.2447e-06	2.79443e-07		0.000262978	0.000285581		1.81949e-06	1.45581e-06		0.00233474	0.00088583		0.000142104	2.50842e-05		6.70322e-07	2.80677e-07		1.56091e-06	1.06254e-06		1.02744e-06	2.14313e-07		1.53954e-06	7.94707e-07
194	28.3601	glucose-1-phosphate deriv.	59563	92.62		0.000258846	5.45877e-05		2.24155e-05	9.90437e-06		8.78752e-05	5.3671e-05		1.13986e-05	4.34797e-06		0.000354264	0.000125397		8.09728e-05	9.15231e-06		3.10538e-05	8.74182e-06		1.37068e-05	2.19854e-05		5.02981e-06	1.38362e-06		1.96897e-05	1.26693e-05
195	31.2083	4-Aminohippuric acid	61789	92.08		0.0011442	0.000391539		0.000186354	8.01876e-05		0.0020006	0.00021913		0.000115796	6.14155e-05		0.00363781	0.000134328		0.00255171	0.000260479		0.000456564	0.000105001		0.0018772	0.000665535		0.000131612	0.000114214		0.000601478	0.000130735
196	28.7139	Zeatin, trans-	1637394	48.68		2.75157e-05	2.38465e-06		4.46285e-06	2.37488e-06		3.98956e-05	1.13708e-06		1.70723e-06	6.24468e-07		4.61633e-05	2.66356e-06		2.51287e-05	2.7141e-06		3.26749e-06	8.72587e-07		2.55165e-05	7.45547e-06		1.25552e-05	1.93546e-05		2.57383e-05	2.54418e-06
197	28.8034	Hexanoic acid	14246152	77.67		0.000801607	6.36629e-05		0.000312393	0.000227945		0.000322205	0.000247022		6.2334e-05	6.33439e-05		0.000350573	0.000122805		5.08697e-05	3.11564e-05		0.000423218	0.00013864		1.5378e-05	1.34841e-05		0.000293618	0.000160339		2.91742e-05	1.77351e-05
198	28.8595	Barbituric acid	67527	52.24		0.000214645	1.58306e-05		4.76499e-05	2.06345e-05		0.00040974	1.41939e-05		0.00254068	0.00235942		0.000361554	2.89078e-05		0.000163616	4.23341e-05		4.92265e-05	4.38898e-06		0.000208917	4.54882e-05		8.55965e-05	0.000120643		0.000122841	1.64252e-05
199	28.9857	2,3-dihydroxypyridine	16867042	68.7		0.000435833	1.79117e-05		0.00124949	0.00044652		0.000287357	2.69807e-05		6.03585e-05	2.82753e-05		0.000132589	5.9015e-06		0.000559186	7.43612e-05		0.00251796	0.000292133		0.000735722	8.1008e-05		0.000415522	2.88956e-05		0.000748126	6.17113e-05
200	28.9953	Nonacosane, n-	630035	96.85		9.65375e-05	8.70613e-06		0.000121701	5.39688e-05		6.96479e-05	2.8345e-05		0.000107052	6.65519e-05		7.67319e-05	2.63672e-05		0.000131351	9.81085e-06		9.45522e-05	3.71679e-05		0.000153253	1.67671e-05		0.00124269	0.000946692		0.000171467	5.13891e-05
201	29.1431	NA	#N/A	56.21		8.90162e-05	1.98009e-05		0.000646385	0.000410946		0.000224758	9.51766e-05		0.000537091	7.75264e-05		0.000302814	0.000155305		0.000194248	5.09825e-05		0.000412487	8.18714e-05		0.000229834	5.32199e-05		0.00270578	0.004039		0.00048066	6.72029e-05
202		NA	#N/A	99.35		0.00148951	0.000263916		0.00755171	0.00168671		0.00201851	9.96522e-05		0.000630385	0.000700262		0.00216241	0.00022191		0.00197849	5.70149e-05		0.00720058	0.000556246		0.00207672	0.000823793		0.0029882	0.00202043		0.000979458	0.00101706
203	29.7281	Octadecanoic acid methyl ester FAME MIX	57114	99.78		0.0206916	0.00175203		0.0116287	0.0107576		0.000349329	3.69732e-05		0.00428832	0.0021432		0.000276259	4.57428e-05		0.0209675	0.000217986		0.0133653	0.00663641		0.0160712	0.00986361		0.0063951	0.00833048		0.0137124	0.00850882
204	29.6384	Biopterin, 5,6,7,8-tetrahydro-	62989337	75.22		1.46068e-06	2.68592e-07		5.18674e-07	9.54382e-08		6.81954e-07	2.3988e-07		0.000371813	0.000231012		1.54109e-06	2.12229e-06		1.04099e-06	6.50688e-07		1.32363e-05	1.41745e-05		2.55678e-05	1.0808e-05		1.84269e-06	1.53163e-06		4.30466e-05	4.88234e-05
205	29.768	Hydroxylamine	7803498	80.1		0.000701309	5.82981e-05		0.000620441	0.000478175		1.08048e-05	8.66053e-07		0.000867352	0.000855663		1.89859e-05	1.954e-06		0.00124411	0.000144781		0.000722036	0.000439805		0.000618789	0.000399794		0.000334348	0.000521418		0.000551535	0.000290561
206	29.9761	kyotorphin	70904562	59.03		0.00159137	0.00111296		0.00681037	0.00562441		0.00080241	0.000661659		3.20623e-05	1.12219e-05		0.0016154	0.000295404		0.00111801	0.000159232		0.00160815	0.00176344		0.000712326	0.00108318		0.0013215	0.00126727		0.00420335	0.00224197
207	41.9665	2-amino-3-methoxybenzoic acid	3177808	80.31		0.00251165	0.000267164		0.00794466	0.00450373		0.00207291	6.56486e-05		0.000172327	3.66436e-05		0.00260773	0.000169833		0.00401415	9.75161e-05		0.00521883	0.00252427		0.00533888	0.00153507		0.00397485	0.00280688		0.00487476	0.000512192
208	30.0309	3,5-dihydroxyphenylglycine	146255665	79.23		0.000138437	0.000184521		0.000826994	0.000336755		0.000187916	4.79043e-05		6.32335e-05	8.21225e-05		0.00029316	4.09094e-05		0.00056176	8.71258e-05		0.000536577	7.82961e-05		0.000446374	0.000230582		0.000515147	0.000309653		0.000338757	0.000119685
209		NA	#N/A	99.35		0.000137869	4.5678e-05		0.000902884	0.000685068		0.000181868	4.43934e-05		3.88081e-05	1.22607e-05		0.000267547	6.43602e-05		0.000250257	5.20938e-05		0.00131453	0.000280851		0.000245732	0.000164746		8.9533e-05	7.91855e-05		0.000147115	1.85066e-05
210	30.3604	NA	#N/A	72.56		0.00166521	0.000307121		0.00387189	0.0029321		0.00358384	0.000484234		0.000531157	0.000804615		0.00409845	0.00206617		0.00316342	0.000247628		0.0057154	0.00152813		0.00224018	0.00182966		0.000692007	0.00106835		0.00170532	0.000590763
211	31.1019	Hippuric acid, 2-hydroxy-	487547	92.41		0.000658868	0.000107321		0.0016549	0.00118552		0.000683517	4.5454e-05		0.000439483	0.00035984		0.000716386	0.00031691		0.00130733	9.07811e-05		0.0024076	0.000928356		0.000461787	0.000361926		0.000220159	0.000354065		0.000572343	0.000179328
212	30.4079	1,2,4-Triazole, 3-amino-	61825	80.46		2.95777e-05	8.44234e-06		5.01029e-05	6.19251e-05		2.10358e-06	7.9999e-07		5.9971e-05	3.97654e-06		1.86747e-06	3.7902e-07		0.000421589	0.00021911		0.000143566	4.95432e-05		0.000425573	0.000583667		8.1651e-06	1.15876e-05		3.07226e-05	1.10951e-05
213		NA	#N/A	99.35		3.09266e-06	1.21806e-06		0.000145203	8.12489e-05		9.1873e-06	5.43161e-06		1.12478e-05	2.71578e-06		8.82516e-06	7.04918e-06		3.43288e-06	7.12729e-07		0.00016929	2.38645e-05		5.17818e-06	3.13639e-06		2.46966e-05	2.02941e-05		2.37093e-05	5.08514e-06
214	33.01	Tritriacontane, n-	630057	97.04		0.000995372	8.82664e-05		0.00237843	0.00043695		0.000240009	5.14836e-05		0.00159675	0.00012769		0.000435486	2.02805e-05		0.00164419	0.000289752		0.00271204	0.000622124		0.00141252	0.000367357		0.0020094	0.00010898		0.00171434	0.000106625
215	31.0695	Succinyl-lactate_	#N/A	66.14		4.39936e-05	4.3967e-05		2.06092e-05	1.63696e-05		4.11489e-05	9.35424e-06		1.60362e-05	1.75928e-05		4.66016e-05	5.38799e-06		6.3752e-05	1.19877e-05		2.5906e-05	1.17764e-05		4.04746e-05	3.26216e-05		2.50986e-06	1.6497e-06		8.2189e-06	7.61761e-06
216	32.5564	Stilbene, 3,5-dihydroxy-, trans-	22139771	79.41		0.000108901	6.95516e-06		0.00160513	0.00181633		0.000155224	3.20147e-05		0.000224067	3.71419e-05		8.80833e-05	5.43501e-06		7.16331e-05	5.91982e-06		0.00102924	0.00104998		8.02209e-05	4.04699e-05		8.72599e-05	0.000137065		9.59714e-05	1.81658e-05
217	31.2864	4-nitrophenol	100027	78.08		1.19789e-05	4.50494e-06		6.49816e-05	4.19332e-05		6.43776e-05	4.43719e-05		5.91115e-05	5.28153e-06		5.8282e-05	2.63339e-05		0.000125543	7.5552e-05		0.000147054	7.74618e-05		1.95448e-06	1.61729e-06		5.99801e-07	3.00335e-07		1.62514e-05	1.55984e-05
218	31.4179	Tyrosine, 3-iodo-	70780	56.43		0.000100994	1.28019e-05		1.43667e-05	1.78178e-05		6.5672e-06	2.86783e-06		8.94048e-06	1.78274e-06		5.92735e-05	7.55388e-06		9.88937e-06	5.98459e-07		1.60317e-05	8.23079e-06		6.32357e-06	4.84812e-06		1.91648e-06	1.41227e-06		2.87676e-06	2.76507e-06
219	31.4889	NA	#N/A	90.84		5.38333e-06	3.39019e-07		4.98549e-05	6.54339e-06		8.7913e-07	2.92272e-07		5.64077e-06	3.047e-06		6.36362e-07	1.41134e-07		2.96188e-06	4.39311e-07		4.80298e-05	1.95695e-06		1.20337e-05	4.97629e-06		3.51431e-05	1.52493e-05		1.18612e-05	4.31774e-06
220	31.7681	Lanosterol, 24,25-dihydro-	79629	77.14		3.97299e-05	9.64635e-06		0.000186503	6.49699e-05		9.16268e-06	4.62171e-06		6.92001e-05	2.32691e-05		4.64579e-05	1.57624e-05		0.000664396	0.000126629		0.000171364	4.2913e-05		0.000339288	0.000218844		0.000313031	0.000255856		0.000437112	8.38537e-05
221		NA	#N/A	99.35		3.00212e-06	9.7617e-07		0.000133347	7.719e-05		4.78804e-06	1.09183e-06		1.70042e-05	2.76645e-05		6.32523e-06	2.69114e-06		3.84158e-07	7.32004e-08		0.000198051	5.50031e-05		6.40807e-07	2.09095e-07		5.76511e-07	2.88982e-07		3.62013e-07	8.87796e-08
222	31.6666	NA	#N/A	83.32		8.07922e-06	1.0889e-06		8.24258e-05	2.78558e-06		7.44732e-05	2.7422e-06		1.77697e-05	2.88386e-06		7.86125e-05	2.1744e-05		1.89973e-05	1.99176e-06		6.0246e-05	1.37725e-05		7.81096e-05	1.20802e-05		2.36894e-05	6.40551e-06		2.39795e-05	1.74711e-06
223		NA	#N/A	99.35		0.00262352	0.000371276		0.00111621	0.00103655		0.00296833	4.82912e-05		0.0107911	0.0145011		0.00252282	0.000360991		0.00142649	0.000139056		0.00105507	0.000327411		0.00117035	0.00088894		0.000493283	0.000417868		0.000833347	0.000164523
224		NA	#N/A	99.35		0.100582	0.00837011		0.0786551	0.0190048		0.124283	0.00824723		0.000361836	0.000128974		0.149578	0.0118209		0.0985937	0.00782637		0.0933764	0.0113744		0.104104	0.0235191		0.0595678	0.0873981		0.0980756	0.00456272
225	32.328	DL-Norvaline	760781	98.11		3.94826e-05	8.23626e-06		1.38412e-05	3.67858e-06		6.87926e-06	1.24193e-06		0.00010556	5.71923e-05		7.97906e-06	6.38134e-06		1.51779e-05	2.75815e-06		1.46909e-05	1.50757e-06		1.93398e-05	6.78974e-06		6.5382e-06	5.01304e-06		9.57756e-06	2.71714e-06
226	32.9062	Acetylsalicylic acid	25436286	59.99		1.10526e-05	3.62409e-06		0.00883018	0.00195103		4.8199e-06	4.70059e-06		9.41574e-05	7.51824e-05		2.79517e-06	1.23237e-06		7.61523e-06	4.22894e-07		0.00337461	0.00270452		1.11459e-05	9.63588e-06		0.0124748	0.0120469		0.000696133	0.000311455
227	33.2051	Fluorescein, 56-carboxy-	72088949	65.2		2.78433e-06	2.00905e-06		0.00146205	0.00118315		2.63217e-06	1.28548e-06		5.04943e-05	5.08583e-06		6.3008e-06	5.50845e-07		5.95702e-06	2.00713e-06		0.00241419	0.000631997		7.40032e-06	5.85791e-06		2.80079e-06	2.28928e-06		3.86481e-06	1.45415e-06
228	33.2896	Melatonin, 6-hydroxy-	2208415	73.87		1.23384e-05	1.30976e-05		4.57371e-05	3.87474e-05		2.84169e-06	1.25896e-06		5.21941e-05	2.59662e-05		2.07318e-06	7.26533e-07		2.30541e-06	4.72908e-07		9.01739e-05	1.05e-05		5.21493e-06	4.74285e-06		5.91178e-05	9.65499e-05		2.2702e-05	2.34824e-06
229		NA	#N/A	99.35		0.00239691	0.00197971		0.00233712	0.00174519		0.00383516	0.000364454		0.000239571	5.37122e-05		0.00103674	0.000246422		0.000401852	8.17806e-05		0.00329391	7.77061e-05		0.00409427	0.000267623		0.00211549	0.00343416		0.000552141	0.000112638
230		NA	#N/A	99.35		0.000365552	0.000115229		0.000532771	0.000298075		0.000142181	3.69977e-05		1.52935e-06	1.60971e-06		0.000325313	2.85625e-05		0.000621441	0.000157289		0.000557582	0.000153226		0.00112658	0.000376782		0.000473155	0.000720302		0.0010701	9.02209e-05
231	33.7395	Docosanoic acid	112856	54.36		1.2305e-05	2.41871e-06		6.8814e-06	4.71119e-06		5.91696e-07	1.59049e-07		8.90124e-07	1.99819e-07		6.11654e-07	2.11857e-07		7.16636e-06	6.85751e-07		8.00968e-06	7.99039e-06		6.83612e-06	2.99175e-06		2.11081e-06	2.22117e-06		4.37041e-06	2.6744e-06
232		NA	#N/A	99.35		0.000375342	2.16453e-05		0.00045938	0.000596887		0.00049781	5.36894e-05		0.00023777	0.000332482		0.000370316	5.32459e-05		0.000203283	1.12608e-05		0.000971279	0.000795501		0.000193068	2.86633e-05		0.00015843	9.68652e-05		0.000163303	2.99985e-05
233		NA	#N/A	99.35		0.000699529	0.000289147		0.0242344	0.00784957		0.000774936	0.000351464		1.49249e-05	2.22982e-05		0.000726698	2.52917e-05		0.000709617	4.00527e-05		0.0110776	0.00952601		0.000974015	7.56491e-05		0.0207673	0.0097934		0.00148979	0.000393818
234	36.9545	Tocopherol, alpha-	2733268	43.17		5.95787e-05	1.3223e-05		0.000679358	0.000265932		0.000325961	3.90069e-05		4.8391e-05	1.29967e-05		0.000553271	0.000213066		0.00079845	9.21589e-05		0.00080848	0.000156037		0.000698585	0.000185628		0.000741234	0.000417688		0.000860372	0.000171919
235	39.6643	methyljasmonate	1211296	57.9		0.000130567	2.49206e-05		0.000141184	3.35859e-05		5.14844e-05	7.45322e-06		0.000336839	0.00019553		5.12049e-05	3.61768e-06		0.000288585	3.60173e-05		0.000210894	4.47853e-05		0.000503912	0.000118704		0.000356795	0.000266272		0.000379324	6.0592e-05
236		NA	#N/A	99.35		0.0633284	0.00727688		0.0929821	0.0856922		0.0735889	0.000579348		0.00401032	0.00491348		0.0979145	0.015701		0.162739	0.0280325		0.093816	0.036799		0.142158	0.0729356		0.0442148	0.0720459		0.11442	0.0171946
237	34.9028	Tocopherol, gamma-	7616220	19.55		8.32272e-05	2.29137e-05		0.000319174	0.000145786		1.44234e-05	1.5661e-06		1.72433e-05	3.39604e-06		1.76565e-05	9.5431e-07		0.000549327	8.47e-05		0.00031428	4.79711e-05		0.000369945	0.000134436		0.000400058	0.000444131		0.00061878	7.03378e-05
238	35.0969	similar to Octadecanoic acid-2,3-dihydroxypropylester	123944	78.07		1.70035e-05	1.03634e-06		3.11231e-05	2.47807e-05		0.000129072	0.00013164		0.000176105	2.47114e-05		4.93861e-05	3.04695e-05		7.599e-05	2.06877e-05		0.000143841	5.53944e-05		0.000235324	9.9128e-05		4.79598e-05	7.83336e-05		8.59747e-05	1.22341e-05
239	35.2551	5-cholestan-3-beta- 22-one	601547	69.82		3.08282e-05	1.60065e-05		6.6612e-06	3.98815e-06		1.48336e-05	1.27338e-05		4.6916e-05	3.33897e-05		5.26154e-05	2.46168e-05		2.30365e-05	4.39246e-06		6.84891e-06	2.39408e-06		3.40432e-05	2.44339e-05		2.40587e-05	2.38606e-05		2.45244e-05	1.09818e-06
240		NA	#N/A	99.35		2.49166e-05	6.41828e-06		0.000156406	7.18579e-05		5.65174e-06	1.2054e-06		8.50279e-08	8.06233e-08		3.92907e-06	1.12415e-06		9.87917e-06	1.50115e-06		0.00024092	2.24375e-05		1.62077e-05	1.34544e-06		6.34646e-05	6.37764e-05		1.19058e-05	3.61676e-06
241	35.6574	s-3,5-dihydroxyphenylglycine	162870293	34.71		0.0318765	0.00191079		0.0259582	0.0142		0.0296416	0.000384641		0.000425033	0.00071842		0.0322484	0.000330196		0.0277178	0.00055069		0.0286542	0.00332758		0.0296339	0.00181196		0.0218291	0.0300427		0.033121	0.00103026
242	41.0075	Naringenin	480411	67.31		9.29622e-05	1.41465e-05		0.00255639	0.00164579		9.57947e-05	5.554e-05		1.89845e-05	2.75711e-06		0.000110409	9.08137e-05		0.00245899	0.000459505		0.00328291	0.000512041		0.00216742	0.000619673		0.00174605	0.00262238		0.00307684	0.000520343
243	36.4929	Propargyl Alcohol	107197	80.63		4.74471e-06	1.52123e-06		6.29417e-06	6.99881e-06		8.7192e-05	4.51603e-05		5.81192e-05	4.90633e-05		0.000198968	3.36776e-05		4.1028e-05	8.37042e-06		2.42116e-06	1.54471e-06		4.94668e-05	4.05751e-05		1.86236e-05	2.88105e-05		1.55731e-05	3.19602e-06
244	23.0577	Calystegine B4	184046853	93.64		0.00668057	0.00223148		0.00506118	0.00773185		0.0194927	0.00417194		2.02325e-07	1.6828e-07		0.0338008	0.00391331		0.0125637	0.000508798		0.00934111	0.00239478		0.0112969	0.00784735		0.000818117	0.00141176		0.0145504	0.00206803
245	37.406	Gamma-Glutamylleucine_	2566394	80.2		0.000366611	0.000330248		0.000421804	0.000680776		0.000767741	0.000211991		0.000156628	0.000134311		0.000881911	0.000213444		0.000431543	3.75742e-05		0.000154802	0.00014066		0.000375448	0.000336413		3.76537e-05	6.16631e-05		0.000920355	0.000770806
246	38.1773	prunetin	552590	20.29		5.69248e-05	1.46724e-05		4.50305e-05	3.7098e-05		0.000144907	3.88455e-05		3.30832e-05	7.96712e-06		0.000115116	2.28537e-05		4.20312e-05	4.69388e-06		2.95548e-05	7.88118e-06		4.024e-05	3.17176e-05		8.21008e-06	9.89626e-06		1.44261e-05	3.80643e-06
247	38.1782	Biopterin	22150761	36.1		2.80651e-05	3.42424e-06		5.3726e-05	3.70205e-05		2.21802e-06	5.83492e-07		1.73161e-05	1.10191e-05		8.31677e-07	5.50336e-07		6.99902e-05	2.54949e-06		7.86393e-05	1.72579e-05		9.89415e-05	2.51256e-05		2.83363e-05	2.73603e-05		7.19755e-05	1.13078e-05
248	38.8495	Homonojirimycin	119557992	20.52		2.2589e-05	7.57606e-06		0.000572702	0.000981764		5.36294e-05	1.17316e-05		5.02085e-07	4.10265e-07		8.74461e-05	2.31189e-05		3.64558e-05	3.21282e-05		0.000974986	0.000447038		1.358e-05	1.05824e-05		1.55482e-05	2.5913e-05		2.05571e-05	1.29767e-06
249		NA	#N/A	99.35		2.5874e-05	6.63971e-06		1.13682e-05	1.13274e-05		1.17525e-05	3.25628e-06		7.98605e-08	5.94232e-08		8.03625e-06	3.56812e-06		3.20306e-05	2.87411e-06		1.42027e-05	1.81762e-06		1.87427e-05	9.43239e-06		9.33243e-06	1.46606e-05		1.36094e-05	3.45894e-06
250	39.8932	Calystegine B2	127414851	29.08		1.54782e-05	7.15322e-06		4.45146e-06	6.21588e-06		1.12963e-05	7.40493e-06		3.74724e-06	2.44083e-06		2.33191e-06	1.68003e-06		1.9284e-05	9.96272e-07		5.3371e-06	2.31352e-07		9.19425e-06	7.23369e-06		9.19848e-06	9.61655e-06		1.3234e-05	2.39086e-06
251		NA	#N/A	99.35		5.57928e-07	4.45902e-07		7.25178e-06	1.03575e-05		3.2312e-06	1.47984e-06		2.16793e-06	1.89082e-06		9.513e-07	1.00217e-06		1.15672e-05	1.55192e-05		3.14523e-06	3.76186e-06		2.11931e-06	1.92865e-06		0.000109139	0.000185869		0.000173769	8.55093e-05
252	41.9352	Piceatannol	10083246	30.48		1.18238e-06	4.44788e-07		1.9046e-05	1.86741e-05		5.30944e-06	3.8835e-06		2.11594e-06	3.47346e-06		5.78386e-06	4.27906e-06		5.7059e-05	1.90646e-05		2.03205e-05	3.18839e-06		3.32217e-05	6.53402e-06		7.95453e-05	0.000109974		0.00010541	0.000101433
253		NA	#N/A	99.35		0.00010664	1.25293e-05		0.000333291	4.31694e-05		4.91977e-05	1.71555e-06		5.95205e-05	5.5179e-05		4.851e-05	6.23403e-06		0.000315243	6.37052e-06		0.000350929	3.36875e-05		0.000385305	2.40333e-05		0.000516891	6.79807e-05		0.000317403	1.34858e-05
