# Supplementary material for: Identification and characterization of small organic compounds within the corona formed around engineered nanoparticles
Source: Royal Society of Chemistry journal article supplement (doi:10.1039/c8en00161h), 2018-01-01
Supplement: c8en00161h1.zip [file Supplementary_Information.docx]

**Supplementary Information**

**Identification and characterization of small organic compounds within the corona formed around engineered nanoparticles**

Mario Pink*1, Nisha Verma1, Christian Kersch1, Simone Schmitz-Spanke1

*1 Institute and Outpatient Clinic of Occupational, Social and Environmental Medicine, Friedrich-Alexander University of Erlangen-Nuremberg (FAU), Henkestr. 9-11, 91054 Erlangen, Germany*

* Corresponding author

Mario Pink, Institute and Outpatient Clinic of Occupational, Social and Environmental Medicine, Friedrich-Alexander-Universität Erlangen-Nürnberg (FAU), Henkestr. 9-11, D-91054 Erlangen, Germany

E-mail: mario.pink@fau.de

Tel.: +49-9131-8526102

Fax: +49-9131-8522317

**Table:** Particle Characterization under native condition and after incubation with both fluids

| Particle | Native Particle | | Culture Medium1 | | | Simulated Lung Fluid1 | | |
| --- | --- | --- | --- | --- | --- | --- | --- | --- |
|  | Size [nm] |  | | Size2 [nm] | Zeta Potential [mV] | | Size2 [nm] | Zeta Potential [mV] |
| CuO | 35 | monoclin | | 278.3 | -5.89 | | 822 | -6.17 |
| TiO2 | 8 | anatase | | 776 | -5.95 | | 1604 | -9.11 |
| ZrO2 | 30 |  | | 315.4 | -7.88 | | 586 | -8.05 |
| ZnO | 3.7 |  | | 175.2 | -9.01 | | 368.6 | -7.58 |

1: Values obtained from dynamic light scattering of particles incubated for 24 h in the corresponding medium as described in the main manuscript. The particle concentration was adjusted to 100 µg.

2: Mean volume diameter
